# Supplementary material for: 2022 European Thyroid Association Guidelines for the management of pediatric thyroid nodules and differentiated thyroid carcinoma
Source: PubMed Central journal article supplement — Eur Thyroid J. 2022 Oct 13;11(6):e220146. doi: 10.1530/ETJ-22-0146 (PMC9716393; doi:10.1530/etj-22-0146), 2022-10-13
Supplement: supplementary_table_1.pdf [file supplementary_table_1.pdf]

## 2022 ETA Guidelines for the Management of Pediatric Thyroid Nodules and Differentiated Thyroid Carcinoma

### Appendix A. Clinical questions

#### Diagnostics/staging

| <b>Clinical question 1.</b> What is the sensitivity and specificity of thyroid ultrasound for distinction of thyroid cancer from a benign thyroid nodule of a child? |                                                                                    |
|----------------------------------------------------------------------------------------------------------------------------------------------------------------------|------------------------------------------------------------------------------------|
| <b>P (Population):</b>                                                                                                                                               | Children diagnosed with a thyroid nodule                                           |
| <b>I (etiologic/risk factor):</b>                                                                                                                                    | Thyroid ultrasound characteristics of thyroid cancer; i.e. solid composition,      |
| <b>C (comparison):</b>                                                                                                                                               | Thyroid ultrasound characteristics of a benign nodule                              |
| <b>O (outcome):</b>                                                                                                                                                  | Ultrasound characteristics compared to histopathological result                    |
| <b>T (type of question):</b>                                                                                                                                         | Etiology                                                                           |
| <b>S (study design):</b>                                                                                                                                             | Cohort study                                                                       |
| <b>Inclusion/exclusion criteria studies:</b>                                                                                                                         | English language<br>Children <21 years of age<br>Study population of at least N=20 |
| <b>Type of search:</b>                                                                                                                                               | Extensive systematic search (PubMed)                                               |

| <b>Clinical question 2.</b> What is the sensitivity/specificity of different suspicious US findings for presence of DTC metastasis to a lymph node? |                                                                                                  |
|-----------------------------------------------------------------------------------------------------------------------------------------------------|--------------------------------------------------------------------------------------------------|
| <b>P (Population):</b>                                                                                                                              | Children or young adolescents diagnosed with a thyroid nodule                                    |
| <b>I (etiologic/risk factor):</b>                                                                                                                   | Suspicious thyroid ultrasound findings in a child or young adolescent with lymph node metastases |
| <b>C (comparison):</b>                                                                                                                              | Thyroid ultrasound findings in a child or young adolescent without lymph node metastases         |
| <b>O (outcome):</b>                                                                                                                                 | Study describing sensitivity/ specificity for US findings of a suspicious lymph node to be DTC   |
| <b>T (type of question):</b>                                                                                                                        | Diagnostic                                                                                       |
| <b>S (study design):</b>                                                                                                                            | Cohort study                                                                                     |
| <b>Inclusion/exclusion criteria studies:</b>                                                                                                        | English language<br>Children <21 years of age<br>Study population of at least N=20               |
| <b>Type of search:</b>                                                                                                                              | Extensive systematic search (PubMed)                                                             |

| <b>Clinical question 3.</b> Will molecular testing in a FNB specimen of a thyroid nodule in a child help you to distinguish from a benign nodule? |                                                                                                                                               |
|---------------------------------------------------------------------------------------------------------------------------------------------------|-----------------------------------------------------------------------------------------------------------------------------------------------|
| <b>P (Population):</b>                                                                                                                            | Children diagnosed with a thyroid nodule(s) by ultrasound with an indeterminate FNA result (AUS, SFN, SFM)                                    |
| <b>I (etiologic/risk factor):</b>                                                                                                                 | Genetic testing of FNA sample for specific mutation (e.g. BRAF 600E, NRAS, RET/PTC and cancer predisposition syndromes such as PTEN, DICER-1) |
| <b>C (comparison):</b>                                                                                                                            | Benign thyroid nodule                                                                                                                         |
| <b>O (outcome):</b>                                                                                                                               | Genetic analyses in FNA specimen related to histopathology                                                                                    |
| <b>T (type of question):</b>                                                                                                                      | Diagnosis                                                                                                                                     |
| <b>S (study design):</b>                                                                                                                          | Cohort study                                                                                                                                  |
| <b>Inclusion/exclusion criteria studies:</b>                                                                                                      | English language<br>Children <21 years of age<br>Study population of at least N=20                                                            |
| <b>Type of search:</b>                                                                                                                            | Extensive systematic search (PubMed)                                                                                                          |

| <b>Clinical question 4.</b> Does genetic testing in thyroid carcinoma tissue in a child or young adolescent alter its management? |                                                                                                                                      |
|-----------------------------------------------------------------------------------------------------------------------------------|--------------------------------------------------------------------------------------------------------------------------------------|
| <b>P (Population):</b>                                                                                                            | Histopathological tissue of children with thyroid carcinoma                                                                          |
| <b>I (etiologic/risk factor):</b>                                                                                                 | Genetic testing for specific mutations (e.g. BRAF 600E, NRAS, RET/PTC, and/or cancer predisposition syndromes such as PTEN, DICER-1) |
| <b>C (comparison):</b>                                                                                                            | No genetic testing                                                                                                                   |
| <b>O (outcome):</b>                                                                                                               | Genetic analyses in thyroid tissue related to outcome of disease                                                                     |
| <b>T (type of question):</b>                                                                                                      | Genetics                                                                                                                             |
| <b>S (study design):</b>                                                                                                          | Cohort study                                                                                                                         |
| <b>Inclusion/exclusion criteria studies:</b>                                                                                      | English language<br>Children <21 years of age<br>Study population of at least N=20                                                   |
| <b>Type of search:</b>                                                                                                            | Extensive systematic search (PubMed)                                                                                                 |

| <b>Clinical question 5. What is sensitivity of the different imaging modalities for presence of pre-operative metastasis?</b> |                                                                                                                             |
|-------------------------------------------------------------------------------------------------------------------------------|-----------------------------------------------------------------------------------------------------------------------------|
| <b>P (Population):</b>                                                                                                        | Children or young adolescents with DTC, pre-operatively                                                                     |
| <b>I (etiologic/risk factor):</b>                                                                                             | Ultrasound/radio iodine scan/MRI/other                                                                                      |
| <b>C (comparison):</b>                                                                                                        | -                                                                                                                           |
| <b>O (outcome):</b>                                                                                                           | Study describing sensitivity/ specificity for an imaging modality to determine the presence of metastasis (pre operatively) |
| <b>T (type of question):</b>                                                                                                  | Diagnosis                                                                                                                   |
| <b>S (study design):</b>                                                                                                      | Cohort study                                                                                                                |
| <b>Inclusion/exclusion criteria studies:</b>                                                                                  | English language<br>Children <21 years of age<br>Study population of at least N= 20                                         |
| <b>Type of search:</b>                                                                                                        | Extensive systematic search (PubMed)                                                                                        |

| <b>Clinical question 6. Are histopathological criteria related to distant/any metastases?</b> |                                                                                                |
|-----------------------------------------------------------------------------------------------|------------------------------------------------------------------------------------------------|
| <b>P (Population):</b>                                                                        | Post thyroidectomy thyroid cancer children or young adolescents                                |
| <b>I (etiologic/risk factor):</b>                                                             | Histopathological criteria: size, capsular invasiveness, vascular ingrowth, surrounding tissue |
| <b>C (comparison):</b>                                                                        | -                                                                                              |
| <b>O (outcome):</b>                                                                           | Histopathological features related to postoperative staging                                    |
| <b>T (type of question):</b>                                                                  | Diagnosis                                                                                      |
| <b>S (study design):</b>                                                                      | Cohort study                                                                                   |
| <b>Inclusion/exclusion criteria studies:</b>                                                  | English language<br>Children <21 years of age<br>Study population of at least N= 20            |
| <b>Type of search:</b>                                                                        | Extensive systematic search (PubMed)                                                           |

| <b>Clinical question 7.</b> Which imaging modality is most sensitive for the presence of DTC, post-operatively? |                                                                                                                              |
|-----------------------------------------------------------------------------------------------------------------|------------------------------------------------------------------------------------------------------------------------------|
| <b>P (Population):</b>                                                                                          | Post thyroidectomy thyroid cancer children or young adolescents                                                              |
| <b>I (etiologic/risk factor):</b>                                                                               | Ultrasound/ radio iodine / CT scan / FDG-PET/other                                                                           |
| <b>C (comparison):</b>                                                                                          | -                                                                                                                            |
| <b>O (outcome):</b>                                                                                             | Study describing sensitivity/ specificity for an imaging modality to determine the presence of metastasis (post operatively) |
| <b>T (type of question):</b>                                                                                    | Diagnosis                                                                                                                    |
| <b>S (study design):</b>                                                                                        | Cohort study                                                                                                                 |
| <b>Inclusion/exclusion criteria studies:</b>                                                                    | English language<br>Children <21 years of age<br>Study population of at least N=20                                           |
| <b>Type of search:</b>                                                                                          | Extensive systematic search (PubMed)                                                                                         |

| <b>Clinical question 8.</b> What is the diagnostic value of serum calcitonin in a child with a thyroid nodule? |                                                                                        |
|----------------------------------------------------------------------------------------------------------------|----------------------------------------------------------------------------------------|
| <b>P (Population):</b>                                                                                         | Children or young adolescents diagnosed with a thyroid nodule                          |
| <b>I (etiologic/risk factor):</b>                                                                              | Calcitonin                                                                             |
| <b>C (comparison):</b>                                                                                         | -                                                                                      |
| <b>O (outcome):</b>                                                                                            | Sensitivity / specificity of calcitonin to for presence of medullary thyroid carcinoma |
| <b>T (type of question):</b>                                                                                   | Diagnosis                                                                              |
| <b>S (study design):</b>                                                                                       | Cohort study                                                                           |
| <b>Inclusion/exclusion criteria studies:</b>                                                                   | English language<br>Children <21 years of age<br>Study population of at least N= 20    |
| <b>Type of search:</b>                                                                                         | Extensive systematic search (PubMed)                                                   |

| <b>Clinical question 9.</b> What is the prevalence of clinical non-clinical relevant thyroid nodules in a child? |                                                                                                                                                |
|------------------------------------------------------------------------------------------------------------------|------------------------------------------------------------------------------------------------------------------------------------------------|
| <b>P (Population):</b>                                                                                           | Children or young adolescents diagnosed with a thyroid nodule, incidental finding, no suspicious features                                      |
| <b>I (etiologic/risk factor):</b>                                                                                | Wait-and-see                                                                                                                                   |
| <b>C (comparison):</b>                                                                                           | Surgical removal                                                                                                                               |
| <b>O (outcome):</b>                                                                                              | Study describing prevalence non clinical relevant thyroid nodules in a child/prevalence study incidentaloma child and outcome /follow-up study |
| <b>T (type of question):</b>                                                                                     | Diagnosis                                                                                                                                      |
| <b>S (study design):</b>                                                                                         | Cohort study                                                                                                                                   |
| <b>Inclusion/exclusion criteria studies:</b>                                                                     | English language<br>Children <21 years of age<br>Study population of at least N=20                                                             |
| <b>Type of search:</b>                                                                                           | Extensive systematic search (PubMed)                                                                                                           |

### Treatment

| <b>Clinical question 10.1</b> What is the difference in outcome of DTC in children treated with a total thyroidectomy versus hemi thyroidectomy? |                                                                                                        |
|--------------------------------------------------------------------------------------------------------------------------------------------------|--------------------------------------------------------------------------------------------------------|
| <b>P (Population):</b>                                                                                                                           | Children or young adolescents diagnosed with thyroid carcinoma, irrespective of stage                  |
| <b>I (intervention):</b>                                                                                                                         | Total thyroidectomy                                                                                    |
| <b>C (comparison):</b>                                                                                                                           | Hemi thyroidectomy                                                                                     |
| <b>O (outcome):</b>                                                                                                                              | Rates of complete remission (comparing total vs hemithyroidectomy) OR Complications/complication rates |
| <b>T (type of question):</b>                                                                                                                     | Treatment                                                                                              |
| <b>S (study design):</b>                                                                                                                         | Cohort study                                                                                           |
| <b>Inclusion/exclusion criteria studies:</b>                                                                                                     | English language<br>Children <21 years of age<br>Study population of at least N= 20                    |
| <b>Type of search:</b>                                                                                                                           | Extensive systematic search (PubMed)                                                                   |

|                                                                                                                                                      |                                                                                                             |
|------------------------------------------------------------------------------------------------------------------------------------------------------|-------------------------------------------------------------------------------------------------------------|
| <b>Clinical question 10.2</b> What is the difference in outcome of DTC in children treated with a total thyroidectomy versus subtotal thyroidectomy? |                                                                                                             |
| <b>P (Population):</b>                                                                                                                               | Children or young adolescents diagnosed with thyroid carcinoma, irrespective of stage                       |
| <b>I (intervention):</b>                                                                                                                             | Subtotal thyroidectomy                                                                                      |
| <b>C (comparison):</b>                                                                                                                               | Total thyroidectomy                                                                                         |
| <b>O (outcome):</b>                                                                                                                                  | Rates of complete remission (comparing subtotal vs total thyroidectomy) OR Complications/complication rates |
| <b>T (type of question):</b>                                                                                                                         | Treatment                                                                                                   |
| <b>S (study design):</b>                                                                                                                             | Cohort study                                                                                                |
| <b>Inclusion/exclusion criteria studies:</b>                                                                                                         | English language<br>Children <21 years of age<br>Study population of at least N= 20                         |
| <b>Type of search:</b>                                                                                                                               | Extensive systematic search (PubMed)                                                                        |

|                                                                                                                                                                                  |                                                                                                                   |
|----------------------------------------------------------------------------------------------------------------------------------------------------------------------------------|-------------------------------------------------------------------------------------------------------------------|
| <b>Clinical question 11.1</b> What is the difference in outcome of DTC in children with microcarcinoma (<1 cm) treated with nodule excision/resection versus subtotal resection? |                                                                                                                   |
| <b>P (Population):</b>                                                                                                                                                           | Children or young adolescents diagnosed with micro carcinoma                                                      |
| <b>I (intervention):</b>                                                                                                                                                         | Nodule excision/resection/subtotal resection                                                                      |
| <b>C (comparison):</b>                                                                                                                                                           | Hemithyroidectomy                                                                                                 |
| <b>O (outcome):</b>                                                                                                                                                              | Rates of complete remission (comparing nodule excision vs subtotal resection) OR Complications/complication rates |
| <b>T (type of question):</b>                                                                                                                                                     | Treatment                                                                                                         |
| <b>S (study design):</b>                                                                                                                                                         | Cohort study                                                                                                      |
| <b>Inclusion/exclusion criteria studies:</b>                                                                                                                                     | English language<br>Children <21 years of age<br>Study population of at least N= 20                               |
| <b>Type of search:</b>                                                                                                                                                           | Extensive systematic search (PubMed)                                                                              |

|                                                                                                                                                                           |                                                                                                        |
|---------------------------------------------------------------------------------------------------------------------------------------------------------------------------|--------------------------------------------------------------------------------------------------------|
| <b>Clinical question 11.2</b> What is the difference in outcome of DTC in children with microcarcinoma (<1 cm) treated with total thyroidectomy versus hemithyroidectomy? |                                                                                                        |
| <b>P (Population):</b>                                                                                                                                                    | Children or young adolescents diagnosed with micro carcinoma                                           |
| <b>I (intervention):</b>                                                                                                                                                  | Total thyroidectomy                                                                                    |
| <b>C (comparison):</b>                                                                                                                                                    | Hemithyroidectomy                                                                                      |
| <b>O (outcome):</b>                                                                                                                                                       | Rates of complete remission (comparing total vs hemithyroidectomy) OR Complications/complication rates |
| <b>T (type of question):</b>                                                                                                                                              | Treatment                                                                                              |
| <b>S (study design):</b>                                                                                                                                                  | Cohort study                                                                                           |
| <b>Inclusion/exclusion criteria studies:</b>                                                                                                                              | English language<br>Children <21 years of age<br>Study population of at least N= 20                    |
| <b>Type of search:</b>                                                                                                                                                    | Extensive systematic search (PubMed)                                                                   |

|                                                                                                                                                                            |                                                                                                                                     |
|----------------------------------------------------------------------------------------------------------------------------------------------------------------------------|-------------------------------------------------------------------------------------------------------------------------------------|
| <b>Clinical question 12.</b> What is the difference in outcome of DTC in children treated with a (prophylactic) central neck dissection versus no central neck dissection? |                                                                                                                                     |
| <b>P (Population):</b>                                                                                                                                                     | Children or young adolescents diagnosed with DTC                                                                                    |
| <b>I (intervention):</b>                                                                                                                                                   | Central neck dissection                                                                                                             |
| <b>C (comparison):</b>                                                                                                                                                     | No central neck dissection                                                                                                          |
| <b>O (outcome):</b>                                                                                                                                                        | Rates of complete remission (comparing lateral and/or central neck dissection vs no dissection) OR Complications/complication rates |
| <b>T (type of question):</b>                                                                                                                                               | Treatment                                                                                                                           |
| <b>S (study design):</b>                                                                                                                                                   | Cohort study                                                                                                                        |
| <b>Inclusion/exclusion criteria studies:</b>                                                                                                                               | English language<br>Children <21 years of age<br>Study population of at least N= 20                                                 |
| <b>Type of search:</b>                                                                                                                                                     | Extensive systematic search (PubMed)                                                                                                |

|                                                                                                                                    |                                                                                                      |
|------------------------------------------------------------------------------------------------------------------------------------|------------------------------------------------------------------------------------------------------|
| <b>Clinical question 13.</b> Is outcome of micro carcinoma worse in children not treated with I-131 versus not treated with I-131? |                                                                                                      |
| <b>P (Population):</b>                                                                                                             | Post thyroidectomy thyroid <u>micro</u> carcinoma children                                           |
| <b>I (intervention):</b>                                                                                                           | I-131 therapy                                                                                        |
| <b>C (comparison):</b>                                                                                                             | No I-131 therapy                                                                                     |
| <b>O (outcome):</b>                                                                                                                | Thyroid cancer recurrence/thyroid cancer related mortality or morbidity (after treatment with I-131) |
| <b>T (type of question):</b>                                                                                                       | Treatment                                                                                            |
| <b>S (study design):</b>                                                                                                           | Cohort study                                                                                         |
| <b>Inclusion/exclusion criteria studies:</b>                                                                                       | English language<br>Children <21 years of age<br>Study population of at least N= 20                  |
| <b>Type of search:</b>                                                                                                             | Extensive systematic search (PubMed)                                                                 |

|                                                                                                                                                               |                                                                                                          |
|---------------------------------------------------------------------------------------------------------------------------------------------------------------|----------------------------------------------------------------------------------------------------------|
| <b>Clinical question 14.</b> Is the most optimal dose effect curve of radio iodine with least side effects calculated by body weight/fixed dose or dosimetry? |                                                                                                          |
| <b>P (Population):</b>                                                                                                                                        | Post thyroidectomy thyroid cancer children                                                               |
| <b>I (intervention):</b>                                                                                                                                      | Fixed/body-weight adapted I-131 activity                                                                 |
| <b>C (comparison):</b>                                                                                                                                        | I-131 activity based on dosimetry                                                                        |
| <b>O (outcome):</b>                                                                                                                                           | Uptake of I-131 in thyroid bed                                                                           |
| <b>T (type of question):</b>                                                                                                                                  | Treatment                                                                                                |
| <b>S (study design):</b>                                                                                                                                      | Cohort study                                                                                             |
| <b>Inclusion/exclusion criteria studies:</b>                                                                                                                  | English language<br>Children or young adolescents <21 years of age<br>Study population of at least N= 20 |
| <b>Type of search:</b>                                                                                                                                        | Extensive systematic search (PubMed)                                                                     |

|                                                                                                   |                                                                                                                                                                                    |
|---------------------------------------------------------------------------------------------------|------------------------------------------------------------------------------------------------------------------------------------------------------------------------------------|
| <b>Clinical question 15.</b> Is rhTSH effective and safe in children during treatment with I-131? |                                                                                                                                                                                    |
| <b>P (Population):</b>                                                                            | Post thyroidectomy thyroid cancer children or young adolescents                                                                                                                    |
| <b>I (intervention):</b>                                                                          | rhTSH                                                                                                                                                                              |
| <b>C (comparison):</b>                                                                            | Withdrawal of LT4                                                                                                                                                                  |
| <b>O (outcome):</b>                                                                               | Complaints, adverse effects, sensitivity of Tg measurement with rhTSH versus withdrawal TSH, efficacy after treatment (outcome: % complete remission after I-131, uptake of I-131) |
| <b>T (type of question):</b>                                                                      | Treatment                                                                                                                                                                          |
| <b>S (study design):</b>                                                                          | Cohort study                                                                                                                                                                       |
| <b>Inclusion/exclusion criteria studies:</b>                                                      | English language<br>Children or young adolescents <21 years of age<br>Study population of at least N= 20                                                                           |
| <b>Type of search:</b>                                                                            | Extensive systematic search (PubMed)                                                                                                                                               |

|                                                                                                                                                                                                                   |                                                                                                       |
|-------------------------------------------------------------------------------------------------------------------------------------------------------------------------------------------------------------------|-------------------------------------------------------------------------------------------------------|
| <b>Clinical question 16.</b> What is the difference in outcome in children with measurable but not rising Tg after treatment for DTC (incomplete biochemical response with I-131 versus a wait-and-see approach?) |                                                                                                       |
| <b>P (Population):</b>                                                                                                                                                                                            | Persistent thyroid cancer in children                                                                 |
| <b>I (intervention):</b>                                                                                                                                                                                          | RAI                                                                                                   |
| <b>C (comparison):</b>                                                                                                                                                                                            | Wait-and-see                                                                                          |
| <b>O (outcome):</b>                                                                                                                                                                                               | Thyroid cancer recurrence / thyroid cancer related morbidity or mortality                             |
| <b>T (type of question):</b>                                                                                                                                                                                      | Treatment                                                                                             |
| <b>S (study design):</b>                                                                                                                                                                                          | Cohort study                                                                                          |
| <b>Inclusion/exclusion criteria studies:</b>                                                                                                                                                                      | English language<br>Children or young adolescents <21 years of age<br>Study population of at least N= |
| <b>Type of search:</b>                                                                                                                                                                                            | Extensive systematic search (PubMed)                                                                  |

|                                                                                                                                                                                                                             |                                                                                     |
|-----------------------------------------------------------------------------------------------------------------------------------------------------------------------------------------------------------------------------|-------------------------------------------------------------------------------------|
| <b>Clinical question 17.</b> What is the difference in outcome in children or young adolescents with recurrent disease/progressive thyroid cancer treated with additional RAI/surgery/other versus a wait-and-see approach? |                                                                                     |
| <b>P (Population):</b>                                                                                                                                                                                                      | Recurrent disease/progressive thyroid cancer or young adolescents in children       |
| <b>I (intervention):</b>                                                                                                                                                                                                    | Additional RAI/surgery/ other                                                       |
| <b>C (comparison):</b>                                                                                                                                                                                                      | Wait-and-see                                                                        |
| <b>O (outcome):</b>                                                                                                                                                                                                         | Thyroid cancer related morbidity or mortality                                       |
| <b>T (type of question):</b>                                                                                                                                                                                                | Treatment                                                                           |
| <b>S (study design):</b>                                                                                                                                                                                                    | Cohort study                                                                        |
| <b>Inclusion/exclusion criteria studies:</b>                                                                                                                                                                                | English language<br>Children <21 years of age<br>Study population of at least N= 20 |
| <b>Type of search:</b>                                                                                                                                                                                                      | Extensive systematic search (PubMed)                                                |

|                                                                                                                                            |                                                                                            |
|--------------------------------------------------------------------------------------------------------------------------------------------|--------------------------------------------------------------------------------------------|
| <b>Clinical question 18.</b> What is the difference in outcome of DTC in children treated with different treatment than surgery and I-131? |                                                                                            |
| <b>P (Population):</b>                                                                                                                     | Children or young adolescents with differentiated thyroid cancer                           |
| <b>I (intervention):</b>                                                                                                                   | TKI, BRAF inhibitors, external beam radiation, (all other treatments but surgery or I-131) |
| <b>C (comparison):</b>                                                                                                                     | -                                                                                          |
| <b>O (outcome):</b>                                                                                                                        | Thyroid cancer related morbidity or mortality                                              |
| <b>T (type of question):</b>                                                                                                               | Treatment                                                                                  |
| <b>S (study design):</b>                                                                                                                   | Cohort study                                                                               |
| <b>Inclusion/exclusion criteria studies:</b>                                                                                               | English language<br>Children <21 years of age                                              |
| <b>Type of search:</b>                                                                                                                     | Extensive systematic search (PubMed)                                                       |

**Follow up**

|                                                                                                                                                               |                                                                                                                                                                                                                                                       |
|---------------------------------------------------------------------------------------------------------------------------------------------------------------|-------------------------------------------------------------------------------------------------------------------------------------------------------------------------------------------------------------------------------------------------------|
| <b>Clinical question 19.</b> What is the sensitivity/specificity of neck ultrasound for recurrent DTC in follow-up of children who have been treated for DTC? |                                                                                                                                                                                                                                                       |
| <b>P (Population):</b>                                                                                                                                        | Children or young adolescents after treatment for DTC                                                                                                                                                                                                 |
| <b>I (intervention):</b>                                                                                                                                      | Neck ultrasound and Tg measurement                                                                                                                                                                                                                    |
| <b>C (comparison):</b>                                                                                                                                        | Neck palpation for lymphadenopathy and Tg measurement                                                                                                                                                                                                 |
| <b>O (outcome):</b>                                                                                                                                           | Study describing sensitivity/ specificity for US findings for recurrent DTC (compared to neck palpation for lymphadenopathy and Tg measurement)<br>OR Outcome of disease/% recurrences in patients with follow up using ultrasound and Tg measurement |
| <b>T (type of question):</b>                                                                                                                                  | Diagnosis                                                                                                                                                                                                                                             |
| <b>S (study design):</b>                                                                                                                                      | Cohort study                                                                                                                                                                                                                                          |
| <b>Inclusion/exclusion criteria studies:</b>                                                                                                                  | English language<br>Children <21 years of age<br>Study population of at least N=20                                                                                                                                                                    |
| <b>Type of search:</b>                                                                                                                                        | Extensive systematic search (PubMed)                                                                                                                                                                                                                  |

|                                                                                                                                                                          |                                                                                     |
|--------------------------------------------------------------------------------------------------------------------------------------------------------------------------|-------------------------------------------------------------------------------------|
| <b>Clinical question 20.</b> What is the sensitivity of I-124 or I-123 for DTC/thyroid rest or recurrent disease in follow up of children who have been treated for DTC? |                                                                                     |
| <b>P (Population):</b>                                                                                                                                                   | Children or young adolescents who have been treated for DTC and need follow up      |
| <b>I (etiologic/risk factor)</b>                                                                                                                                         | I-124 or I-123 and Tg measurement                                                   |
| <b>C (comparison):</b>                                                                                                                                                   | Ultrasound neck and Tg measurement                                                  |
| <b>O (outcome):</b>                                                                                                                                                      | Sensitivity of I-124/I-123 for DTC/thyroid rest / recurrent disease                 |
| <b>T (type of question):</b>                                                                                                                                             | Diagnosis                                                                           |
| <b>S (study design):</b>                                                                                                                                                 | Cohort study                                                                        |
| <b>Inclusion/exclusion criteria studies:</b>                                                                                                                             | English language<br>Children <21 years of age<br>Study population of at least N= 20 |
| <b>Type of search:</b>                                                                                                                                                   | Extensive systematic search (PubMed)                                                |

|                                                                                                                                                           |                                                                                                            |
|-----------------------------------------------------------------------------------------------------------------------------------------------------------|------------------------------------------------------------------------------------------------------------|
| <b>Clinical question 21.</b> What are the late effects of treatment of DTC? (Cardiac late effects, salivary glands, psychosocial, bone, female fertility) |                                                                                                            |
| <b>P (Population):</b>                                                                                                                                    | Children or young adolescents treated for DTC                                                              |
| <b>I (etiologic/risk factor)</b>                                                                                                                          | -                                                                                                          |
| <b>C (comparison):</b>                                                                                                                                    | -                                                                                                          |
| <b>O (outcome):</b>                                                                                                                                       | Thyroid cancer related cardiac, salivary gland, female fertility, bone or psychosocial morbidity/mortality |
| <b>T (type of question):</b>                                                                                                                              | Diagnosis                                                                                                  |
| <b>S (study design):</b>                                                                                                                                  | Cohort study                                                                                               |
| <b>Inclusion/exclusion criteria studies:</b>                                                                                                              | English language<br>Children or young adolescents <21 years of age<br>Study population of at least N=20    |
| <b>Type of search:</b>                                                                                                                                    | Extensive systematic search (PubMed)                                                                       |

|                                                                                                                                                                                                                                                          |                                                                                      |
|----------------------------------------------------------------------------------------------------------------------------------------------------------------------------------------------------------------------------------------------------------|--------------------------------------------------------------------------------------|
| <b>Clinical question 22.</b> Is presentation, outcome and/or disease course of DTC in children or young adolescents with genetic syndromes different than in children without genetic syndromes for which treatment and/or follow up should be adjusted? |                                                                                      |
| <b>P (Population):</b>                                                                                                                                                                                                                                   | Children or young adolescents treated for DTC                                        |
| <b>I (etiologic/risk factor)</b>                                                                                                                                                                                                                         | Genetic syndromes (Cowden, DICER, Li Fraumeni, Lynch syndrome, FAP, Carney complex). |
| <b>C (comparison):</b>                                                                                                                                                                                                                                   | Patients without genetic syndromes                                                   |
| <b>O (outcome):</b>                                                                                                                                                                                                                                      | Thyroid cancer recurrence / thyroid cancer related mortality                         |
| <b>T (type of question):</b>                                                                                                                                                                                                                             | Etiology                                                                             |
| <b>S (study design):</b>                                                                                                                                                                                                                                 | Cohort study (multi-variate analysis)                                                |
| <b>Inclusion/exclusion criteria studies:</b>                                                                                                                                                                                                             | English language<br>Children <21 years of age                                        |
| <b>Type of search:</b>                                                                                                                                                                                                                                   | Extensive systematic search (PubMed)                                                 |

|                                                                                                                                                                                                                                                                 |                                                                                     |
|-----------------------------------------------------------------------------------------------------------------------------------------------------------------------------------------------------------------------------------------------------------------|-------------------------------------------------------------------------------------|
| <b>Clinical question 23.</b> Is presentation, outcome and/or disease course of DTC in children with a history of radiation exposure different than in children without a history of radiation exposure for which treatment and/or follow up should be adjusted? |                                                                                     |
| <b>P (Population):</b>                                                                                                                                                                                                                                          | Children or young adolescents treated for DTC                                       |
| <b>I (etiologic/risk factor)</b>                                                                                                                                                                                                                                | History of radiation exposure                                                       |
| <b>C (comparison):</b>                                                                                                                                                                                                                                          | Patients with no history of radiation exposure                                      |
| <b>O (outcome):</b>                                                                                                                                                                                                                                             | Thyroid cancer recurrence/thyroid cancer related mortality                          |
| <b>T (type of question):</b>                                                                                                                                                                                                                                    | Etiology                                                                            |
| <b>S (study design):</b>                                                                                                                                                                                                                                        | Cohort study (multi-variate analysis)                                               |
| <b>Inclusion/exclusion criteria studies:</b>                                                                                                                                                                                                                    | English language<br>Children <21 years of age<br>Study population of at least N= 20 |
| <b>Type of search:</b>                                                                                                                                                                                                                                          | Extensive systematic search (PubMed)                                                |
