# Supplementary material for: 2022 European Thyroid Association Guidelines for the management of pediatric thyroid nodules and differentiated thyroid carcinoma
Source: PubMed Central journal article supplement — Eur Thyroid J. 2022 Oct 13;11(6):e220146. doi: 10.1530/ETJ-22-0146 (PMC9716393; doi:10.1530/etj-22-0146), 2022-10-13
Supplement: supplementary_table_2.pdf [file supplementary_table_2.pdf]

## 2022 ETA Guidelines for the Management of Pediatric Thyroid Nodules and Differentiated Thyroid Carcinoma

### Appendix B. Pubmed searches

Search 1: clinical questions 1, 2

| Date       | Search strategy                                                                                                          | # records |
|------------|--------------------------------------------------------------------------------------------------------------------------|-----------|
| 19-05-2020 | Thyroid cancer AND children or young adolescents AND ultrasonography AND specificity/sensitivity Filter: Humans; English | 478       |

#### 1. Thyroid cancer

“Thyroid neoplasms”[mesh] OR “thyroid carcinoma”[tiab]OR “thyroid cancer”[tiab] OR “papillary thyroid carcinoma”[tiab] OR “follicular thyroid carcinoma”[tiab] OR “papillary thyroid cancer”[tiab] OR “PTC”[tiab] OR “DTC”[tiab] OR “follicular thyroid cancer”[tiab] OR “thyroid neoplasm”[tiab] OR “thyroid gland”[tiab] OR “thyroid adenoma”[tiab] OR “thyroid nodule”[tiab] NOT graves[tiab] NOT medullary[tiab]

#### 2. Children or young adolescents

Infant[Mesh] OR infan\*[tiab] OR "Infant, Newborn"[Mesh]OR newborn\*[tiab] OR perinat\*[tiab] OR neonat\*[tiab] OR baby\*[tiab] OR babies[tiab] OR toddler\*[tiab] OR minor\*[tiab] OR boys[tiab] OR boy[tiab] OR girl\*[tiab] OR kids[tiab] OR “child”[Mesh] OR child\*[tiab] OR schoolchild\*[tiab] OR “school child”[tiab] OR Adolescent[Mesh] OR adolescen\*[tiab] OR juvenil\*[tiab] OR youth\*[tiab] OR teen\*[tiab] OR pubescen\*[tiab] OR pediatrics[Mesh] OR pediatric\*[tiab] OR peadiatric\*[tiab] OR school\*[tiab] OR prematur\*[tiab] OR preterm\*[tiab]

#### 3. Ultrasonography

Ultrasonography[mesh] OR ultrasonography[tiab] OR ultrasound[tiab]

#### 4. Specificity/sensitivity

“sensitivity and specificity”[mesh] OR specificity[tiab]

**Search 2:** clinical questions 3 and 4

| Date       | Search strategy                                                                              | # records |
|------------|----------------------------------------------------------------------------------------------|-----------|
| 19-05-2020 | Thyroid cancer AND children or young adolescents AND genetic testing Filter: Humans; English | 121       |

**1. Thyroid cancer**

“Thyroid neoplasms”[mesh] OR “thyroid carcinoma”[tiab]OR “thyroid cancer”[tiab] OR “papillary thyroid carcinoma”[tiab] OR “follicular thyroid carcinoma”[tiab] OR “papillary thyroid cancer”[tiab] OR “PTC”[tiab] OR “DTC”[tiab] OR “follicular thyroid cancer”[tiab] OR “thyroid neoplasm”[tiab] OR “thyroid gland”[tiab] OR “thyroid adenoma”[tiab] OR “thyroid nodule”[tiab] NOT graves[tiab] NOT medullary[tiab]

**2. Children or young adolescents**

Infant[Mesh] OR infan\*[tiab] OR "Infant, Newborn"[Mesh]OR newborn\*[tiab] OR perinat\*[tiab] OR neonat\*[tiab] OR baby\*[tiab] OR babies[tiab] OR toddler\*[tiab] OR minor\*[tiab] OR boys[tiab] OR boy[tiab] OR girl\*[tiab] OR kids[tiab] OR “child”[Mesh] OR child\*[tiab] OR schoolchild\*[tiab] OR “school child”[tiab] OR Adolescent[Mesh] OR adolescen\*[tiab] OR juvenil\*[tiab] OR youth\*[tiab] OR teen\*[tiab] OR pubescen\*[tiab] OR pediatrics[Mesh] OR pediatric\*[tiab] OR peadiatric\*[tiab] OR school\*[tiab] OR prematur\*[tiab] OR preterm\*[tiab]

**3. Genetic testing**

“genetic testing”[mesh] OR “genetic testing”[tiab] OR “genetic analysis”[tiab]

**Search 3:** clinical questions 5, 7, 20

| Date       | Search strategy                                                                                         | # records |
|------------|---------------------------------------------------------------------------------------------------------|-----------|
| 19-05-2020 | Thyroid cancer AND children or young adolescents AND imaging<br>Filter: Humans; English, Clinical Study | 174       |

**1. Thyroid cancer**

"Thyroid neoplasms"[mesh] OR "thyroid carcinoma"[tiab]OR "thyroid cancer"[tiab] OR "papillary thyroid carcinoma"[tiab] OR "follicular thyroid carcinoma"[tiab] OR "papillary thyroid cancer"[tiab] OR "PTC"[tiab] OR "DTC"[tiab] OR "follicular thyroid cancer"[tiab] OR "thyroid neoplasm"[tiab] OR "thyroid gland"[tiab] OR "thyroid adenoma"[tiab] OR "thyroid nodule"[tiab] NOT graves[tiab] NOT medullary[tiab]

**2. Children or young adolescents**

Infant[Mesh] OR infan\*[tiab] OR "Infant, Newborn"[Mesh]OR newborn\*[tiab] OR perinat\*[tiab] OR neonat\*[tiab] OR baby\*[tiab] OR babies[tiab] OR toddler\*[tiab] OR minor\*[tiab] OR boys[tiab] OR boy[tiab] OR girl\*[tiab] OR kids[tiab] OR "child"[Mesh] OR child\*[tiab] OR schoolchild\*[tiab] OR "school child\*\*"[tiab] OR Adolescent[Mesh] OR adolescen\*[tiab] OR juvenil\*[tiab] OR youth\*[tiab] OR teen\*[tiab] OR pubescen\*[tiab] OR pediatrics[Mesh] OR pediatric\*[tiab] OR peadiatric\*[tiab] OR school\*[tiab] OR prematur\*[tiab] OR preterm\*[tiab]

**3. Imaging**

"Thyroid Neoplasms/diagnostic imaging"[Mesh] OR Ultrasonography[mesh] OR ultrasonography[tiab] OR ultrasound[tiab] OR "radionuclide imaging"[mesh] OR "diagnostic imaging"[sh] OR "magnetic resonance imaging"[mesh] OR "magnetic resonance imaging"[tiab] OR MRI[tiab] OR "single photon emission computed tomography computed tomography"[mesh] OR SPECT[tiab] OR CT[tiab] OR "positron emission tomography computed tomography"[mesh]

**Search 4:** clinical questions 6

| Date       | Search strategy                                                                                           | # records |
|------------|-----------------------------------------------------------------------------------------------------------|-----------|
| 19-05-2020 | Thyroid cancer AND children or young adolescents AND histology<br>Filter: Humans; English, Clinical Study | 118       |

**1. Thyroid cancer**

"Thyroid neoplasms"[mesh] OR "thyroid carcinoma"[tiab]OR "thyroid cancer"[tiab] OR "papillary thyroid carcinoma"[tiab] OR "follicular thyroid carcinoma"[tiab] OR "papillary thyroid cancer"[tiab] OR "PTC"[tiab] OR "DTC"[tiab] OR "follicular thyroid cancer"[tiab] OR "thyroid neoplasm"[tiab] OR "thyroid gland"[tiab] OR "thyroid adenoma"[tiab] OR "thyroid nodule"[tiab] NOT graves[tiab] NOT medullary[tiab]

**2. Children or young adolescents**

Infant[Mesh] OR infan\*[tiab] OR "Infant, Newborn"[Mesh]OR newborn\*[tiab] OR perinat\*[tiab] OR neonat\*[tiab] OR baby\*[tiab] OR babies[tiab] OR toddler\*[tiab] OR minor\*[tiab] OR boys[tiab] OR boy[tiab] OR girl\*[tiab] OR kids[tiab] OR "child"[Mesh] OR child\*[tiab] OR schoolchild\*[tiab] OR "school child\*[tiab] OR Adolescent[Mesh] OR adolescen\*[tiab] OR juvenil\*[tiab] OR youth\*[tiab] OR teen\*[tiab] OR pubescen\*[tiab] OR pediatrics[Mesh] OR pediatric\*[tiab] OR peadiatric\*[tiab] OR school\*[tiab] OR prematur\*[tiab] OR preterm\*[tiab]

**3. Histology**

"Thyroid Neoplasms/pathology"[Mesh] OR "histologic"[title] OR "Clinicopathologic\*[title] OR "pathologic\*[title] OR "pathology"[title] OR "histology"[title]

**Search 5:** clinical questions 8

| Date       | Search strategy                                                                                             | # records |
|------------|-------------------------------------------------------------------------------------------------------------|-----------|
| 19-05-2020 | Thyroid cancer including medullary AND children or young adolescents AND calcitonin Filter: Humans; English | 425       |

**1. Thyroid cancer including medullary**

“Thyroid neoplasms”[mesh] OR “thyroid carcinoma”[tiab]OR “thyroid cancer”[tiab] OR “papillary thyroid carcinoma”[tiab] OR “follicular thyroid carcinoma”[tiab] OR “papillary thyroid cancer”[tiab] OR “PTC”[tiab] OR “DTC”[tiab] OR “follicular thyroid cancer”[tiab] OR “thyroid neoplasm”[tiab] OR “thyroid gland”[tiab] OR “thyroid adenoma”[tiab] OR “thyroid nodule”[tiab] NOT graves[tiab]

**2. Children or young adolescents**

Infant[Mesh] OR infan\*[tiab] OR "Infant, Newborn"[Mesh]OR newborn\*[tiab] OR perinat\*[tiab] OR neonat\*[tiab] OR baby\*[tiab] OR babies[tiab] OR toddler\*[tiab] OR minor\*[tiab] OR boys[tiab] OR boy[tiab] OR girl\*[tiab] OR kids[tiab] OR “child”[Mesh] OR child\*[tiab] OR schoolchild\*[tiab] OR “school child”[tiab] OR Adolescent[Mesh] OR adolescen\*[tiab] OR juvenil\*[tiab] OR youth\*[tiab] OR teen\*[tiab] OR pubescen\*[tiab] OR pediatrics[Mesh] OR pediatric\*[tiab] OR peadiatric\*[tiab] OR school\*[tiab] OR prematur\*[tiab] OR preterm\*[tiab]

**3. Calcitonin**

“calcitonin”[mesh] OR “calcitonin”[title]

**Search 6:** clinical questions 9

| Date       | Search strategy                                                                                  | # records |
|------------|--------------------------------------------------------------------------------------------------|-----------|
| 19-05-2020 | Thyroid cancer AND children or young adolescents AND incidental findings Filter: Humans; English | 140       |

**1. Thyroid cancer**

“Thyroid neoplasms”[mesh] OR “thyroid carcinoma”[tiab]OR “thyroid cancer”[tiab] OR “papillary thyroid carcinoma”[tiab] OR “follicular thyroid carcinoma”[tiab] OR “papillary thyroid cancer”[tiab] OR “PTC”[tiab] OR “DTC”[tiab] OR “follicular thyroid cancer”[tiab] OR “thyroid neoplasm”[tiab] OR “thyroid gland”[tiab] OR “thyroid adenoma”[tiab] OR “thyroid nodule”[tiab] NOT graves[tiab] NOT medullary[tiab]

**2. Children or young adolescents**

Infant[Mesh] OR infan\*[tiab] OR "Infant, Newborn"[Mesh]OR newborn\*[tiab] OR perinat\*[tiab] OR neonat\*[tiab] OR baby\*[tiab] OR babies[tiab] OR toddler\*[tiab] OR minor\*[tiab] OR boys[tiab] OR boy[tiab] OR girl\*[tiab] OR kids[tiab] OR “child”[Mesh] OR child\*[tiab] OR schoolchild\*[tiab] OR “school child”[tiab] OR Adolescent[Mesh] OR adolescen\*[tiab] OR juvenil\*[tiab] OR youth\*[tiab] OR teen\*[tiab] OR pubescen\*[tiab] OR pediatrics[Mesh] OR pediatric\*[tiab] OR peadiatric\*[tiab] OR school\*[tiab] OR prematur\*[tiab] OR preterm\*[tiab]

**3. Incidental findings**

“Incidental findings”[mesh] OR “incidental”[tiab]

**Search 7:** clinical questions 10, 11, 12

| Date       | Search strategy                                                                                                                      | # records |
|------------|--------------------------------------------------------------------------------------------------------------------------------------|-----------|
| 08-06-2020 | Thyroid cancer AND children or young adolescents AND surgery<br>Filter: Humans; English, from April 2014-2020, Exclusion of 'Trauma' | 696       |

**1. Thyroid cancer**

"Thyroid neoplasms"[mesh] OR "thyroid carcinoma"[tiab]OR "thyroid cancer"[tiab] OR "papillary thyroid carcinoma"[tiab] OR "follicular thyroid carcinoma"[tiab] OR "papillary thyroid cancer"[tiab] OR "PTC"[tiab] OR "DTC"[tiab] OR "follicular thyroid cancer"[tiab] OR "thyroid neoplasm"[tiab] OR "thyroid gland"[tiab] OR "thyroid adenoma"[tiab] OR "thyroid nodule"[tiab] NOT graves[tiab] NOT medullary[tiab]

**2. Children or young adolescents**

Infant[Mesh] OR infan\*[tiab] OR "Infant, Newborn"[Mesh]OR newborn\*[tiab] OR perinat\*[tiab] OR neonat\*[tiab] OR baby\*[tiab] OR babies[tiab] OR toddler\*[tiab] OR minor\*[tiab] OR boys[tiab] OR boy[tiab] OR girl\*[tiab] OR kids[tiab] OR "child"[Mesh] OR child\*[tiab] OR schoolchild\*[tiab] OR "school child\*[tiab] OR Adolescent[Mesh] OR adolescen\*[tiab] OR juvenil\*[tiab] OR youth\*[tiab] OR teen\*[tiab] OR pubescen\*[tiab] OR pediatrics[Mesh] OR pediatric\*[tiab] OR peadiatric\*[tiab] OR school\*[tiab] OR prematur\*[tiab] OR preterm\*[tiab]

**3. Surgery**

"Thyroid Neoplasms/surgery"[Mesh] OR "Thyroidectomy"[Mesh] OR "thyroidectomy"[title] OR "surgery"[title] OR "surgical"[title] OR "dissection"[title]

**Exclusion of 'trauma'**

'trauma': "injuries"[Subheading] OR "injuries"[All Fields] OR "trauma"[All Fields] OR "wounds and injuries"[MeSH Terms] OR ("wounds"[All Fields] AND "injuries"[All Fields]) OR "wounds and injuries"[All Fields] OR "trauma's"[All Fields] OR "traumas"[All Fields]

**Search 8:** clinical questions 13,14

| Date       | Search strategy                                                                                               | # records |
|------------|---------------------------------------------------------------------------------------------------------------|-----------|
| 20-05-2020 | Thyroid cancer AND children or young adolescents AND radioiodine Filter: Humans; English from April 2014-2020 | 243       |

**1. Thyroid cancer**

"Thyroid neoplasms"[mesh] OR "thyroid carcinoma"[tiab]OR "thyroid cancer"[tiab] OR "papillary thyroid carcinoma"[tiab] OR "follicular thyroid carcinoma"[tiab] OR "papillary thyroid cancer"[tiab] OR "PTC"[tiab] OR "DTC"[tiab] OR "follicular thyroid cancer"[tiab] OR "thyroid neoplasm"[tiab] OR "thyroid gland"[tiab] OR "thyroid adenoma"[tiab] OR "thyroid nodule"[tiab] NOT graves[tiab] NOT medullary[tiab]

**2. Children or young adolescents**

Infant[Mesh] OR infan\*[tiab] OR "Infant, Newborn"[Mesh]OR newborn\*[tiab] OR perinat\*[tiab] OR neonat\*[tiab] OR baby\*[tiab] OR babies[tiab] OR toddler\*[tiab] OR minor\*[tiab] OR boys[tiab] OR boy[tiab] OR girl\*[tiab] OR kids[tiab] OR "child"[Mesh] OR child\*[tiab] OR schoolchild\*[tiab] OR "school child\*[tiab] OR Adolescent[Mesh] OR adolescen\*[tiab] OR juvenil\*[tiab] OR youth\*[tiab] OR teen\*[tiab] OR pubescen\*[tiab] OR pediatrics[Mesh] OR pediatric\*[tiab] OR peadiatric\*[tiab] OR school\*[tiab] OR prematur\*[tiab] OR preterm\*[tiab]

**3. Radioiodine**

"Iodine Radioisotopes/administration and dosage"[Mesh] OR "Iodine Radioisotopes/therapeutic use"[Mesh] OR "thyroid neoplasms/radiotherapy"[mesh] OR "radioactive iodine"[title] OR "I-131"[title]

**Search 9:** clinical questions 15

| Date       | Search strategy                                            | # records |
|------------|------------------------------------------------------------|-----------|
| 20-05-2020 | Thyroid cancer AND children or young adolescents AND rhTSH | 39        |

**1. Thyroid cancer**

“Thyroid neoplasms”[mesh] OR “thyroid carcinoma”[tiab]OR “thyroid cancer”[tiab] OR “papillary thyroid carcinoma”[tiab] OR “follicular thyroid carcinoma”[tiab] OR “papillary thyroid cancer”[tiab] OR “PTC”[tiab] OR “DTC”[tiab] OR “follicular thyroid cancer”[tiab] OR “thyroid neoplasm”[tiab] OR “thyroid gland”[tiab] OR “thyroid adenoma”[tiab] OR “thyroid nodule”[tiab] NOT graves[tiab] NOT medullary[tiab]

**2. Children or young adolescents**

Infant[Mesh] OR infan\*[tiab] OR "Infant, Newborn"[Mesh]OR newborn\*[tiab] OR perinat\*[tiab] OR neonat\*[tiab] OR baby\*[tiab] OR babies[tiab] OR toddler\*[tiab] OR minor\*[tiab] OR boys[tiab] OR boy[tiab] OR girl\*[tiab] OR kids[tiab] OR “child”[Mesh] OR child\*[tiab] OR schoolchild\*[tiab] OR “school child”[tiab] OR Adolescent[Mesh] OR adolescen\*[tiab] OR juvenil\*[tiab] OR youth\*[tiab] OR teen\*[tiab] OR pubescen\*[tiab] OR pediatrics[Mesh] OR pediatric\*[tiab] OR peadiatric\*[tiab] OR school\*[tiab] OR prematur\*[tiab] OR preterm\*[tiab]

**3. Recombinant TSH**

"Thyrotropin Alfa"[Mesh] OR “recombinant human TSH”[title] OR rhTSH[title] OR thyrogen[title]

**Search 10:** clinical questions 16

| Date       | Search strategy                                                                                 | # records |
|------------|-------------------------------------------------------------------------------------------------|-----------|
| 20-05-2020 | Thyroid cancer AND children or young adolescents AND persistent disease Filter: Humans; English | 82        |

**1. Thyroid cancer**

“Thyroid neoplasms”[mesh] OR “thyroid carcinoma”[tiab]OR “thyroid cancer”[tiab] OR “papillary thyroid carcinoma”[tiab] OR “follicular thyroid carcinoma”[tiab] OR “papillary thyroid cancer”[tiab] OR “PTC”[tiab] OR “DTC”[tiab] OR “follicular thyroid cancer”[tiab] OR “thyroid neoplasm”[tiab] OR “thyroid gland”[tiab] OR “thyroid adenoma”[tiab] OR “thyroid nodule”[tiab] NOT graves[tiab] NOT medullary[tiab]

**2. Children or young adolescents**

Infant[Mesh] OR infan\*[tiab] OR "Infant, Newborn"[Mesh]OR newborn\*[tiab] OR perinat\*[tiab] OR neonat\*[tiab] OR baby\*[tiab] OR babies[tiab] OR toddler\*[tiab] OR minor\*[tiab] OR boys[tiab] OR boy[tiab] OR girl\*[tiab] OR kids[tiab] OR “child”[Mesh] OR child\*[tiab] OR schoolchild\*[tiab] OR “school child”[tiab] OR Adolescent[Mesh] OR adolescen\*[tiab] OR juvenil\*[tiab] OR youth\*[tiab] OR teen\*[tiab] OR pubescen\*[tiab] OR pediatrics[Mesh] OR pediatric\*[tiab] OR peadiatric\*[tiab] OR school\*[tiab] OR prematur\*[tiab] OR preterm\*[tiab]

**3. Persistent disease**

“persistent disease”[title]

**Search 11:** clinical questions 17

| Date       | Search strategy                                                                                                                 | # records |
|------------|---------------------------------------------------------------------------------------------------------------------------------|-----------|
| 20-05-2020 | Thyroid cancer AND children or young adolescents AND recurrent/progressive disease Filter: Humans; English from April 2014-2020 | 287       |

**1. Thyroid cancer**

"Thyroid neoplasms"[mesh] OR "thyroid carcinoma"[tiab]OR "thyroid cancer"[tiab] OR "papillary thyroid carcinoma"[tiab] OR "follicular thyroid carcinoma"[tiab] OR "papillary thyroid cancer"[tiab] OR "PTC"[tiab] OR "DTC"[tiab] OR "follicular thyroid cancer"[tiab] OR "thyroid neoplasm"[tiab] OR "thyroid gland"[tiab] OR "thyroid adenoma"[tiab] OR "thyroid nodule"[tiab] NOT graves[tiab] NOT medullary[tiab]

**2. Children or young adolescents**

Infant[Mesh] OR infan\*[tiab] OR "Infant, Newborn"[Mesh]OR newborn\*[tiab] OR perinat\*[tiab] OR neonat\*[tiab] OR baby\*[tiab] OR babies[tiab] OR toddler\*[tiab] OR minor\*[tiab] OR boys[tiab] OR boy[tiab] OR girl\*[tiab] OR kids[tiab] OR "child"[Mesh] OR child\*[tiab] OR schoolchild\*[tiab] OR "school child\*[tiab] OR Adolescent[Mesh] OR adolescen\*[tiab] OR juvenil\*[tiab] OR youth\*[tiab] OR teen\*[tiab] OR pubescen\*[tiab] OR pediatrics[Mesh] OR pediatric\*[tiab] OR peadiatric\*[tiab] OR school\*[tiab] OR prematur\*[tiab] OR preterm\*[tiab]

**3. Recurrent/progressive disease**

"Neoplasm Recurrence, Local"[Mesh] OR "recurrence"[Mesh] OR "Disease Progression"[Mesh] OR "progressive"[title] OR "recurrence"[title]

**Search 12:** clinical questions 18

| Date       | Search strategy                                                                                    | # records |
|------------|----------------------------------------------------------------------------------------------------|-----------|
| 20-05-2020 | Thyroid cancer AND children or young adolescents AND alternative treatment Filter: Humans; English | 182       |

**1. Thyroid cancer**

“Thyroid neoplasms”[mesh] OR “thyroid carcinoma”[tiab]OR “thyroid cancer”[tiab] OR “papillary thyroid carcinoma”[tiab] OR “follicular thyroid carcinoma”[tiab] OR “papillary thyroid cancer”[tiab] OR “PTC”[tiab] OR “DTC”[tiab] OR “follicular thyroid cancer”[tiab] OR “thyroid neoplasm”[tiab] OR “thyroid gland”[tiab] OR “thyroid adenoma”[tiab] OR “thyroid nodule”[tiab] NOT graves[tiab] NOT medullary[tiab]

**2. Children or young adolescents**

Infant[Mesh] OR infan\*[tiab] OR "Infant, Newborn"[Mesh]OR newborn\*[tiab] OR perinat\*[tiab] OR neonat\*[tiab] OR baby\*[tiab] OR babies[tiab] OR toddler\*[tiab] OR minor\*[tiab] OR boys[tiab] OR boy[tiab] OR girl\*[tiab] OR kids[tiab] OR “child”[Mesh] OR child\*[tiab] OR schoolchild\*[tiab] OR “school child”[tiab] OR Adolescent[Mesh] OR adolescen\*[tiab] OR juvenil\*[tiab] OR youth\*[tiab] OR teen\*[tiab] OR pubescen\*[tiab] OR pediatrics[Mesh] OR pediatric\*[tiab] OR peadiatric\*[tiab] OR school\*[tiab] OR prematur\*[tiab] OR preterm\*[tiab]

**3. Alternative treatment**

“thyroid neoplasms/drug therapy”[Mesh] OR “external beam”[title]

**Search 16:** clinical questions 19

| Date       | Search strategy                                                                                                                          | # records |
|------------|------------------------------------------------------------------------------------------------------------------------------------------|-----------|
| 19-06-2020 | Thyroid cancer AND children or young adolescents AND ultrasonography AND specificity/sensitivity AND 'recurrent' Filter: Humans; English | 61        |

**1. Thyroid cancer**

"Thyroid neoplasms"[mesh] OR "thyroid carcinoma"[tiab]OR "thyroid cancer"[tiab] OR "papillary thyroid carcinoma"[tiab] OR "follicular thyroid carcinoma"[tiab] OR "papillary thyroid cancer"[tiab] OR "PTC"[tiab] OR "DTC"[tiab] OR "follicular thyroid cancer"[tiab] OR "thyroid neoplasm"[tiab] OR "thyroid gland"[tiab] OR "thyroid adenoma"[tiab] OR "thyroid nodule"[tiab] NOT graves[tiab] NOT medullary[tiab]

**2. Children or young adolescents**

Infant[Mesh] OR infan\*[tiab] OR "Infant, Newborn"[Mesh]OR newborn\*[tiab] OR perinat\*[tiab] OR neonat\*[tiab] OR baby\*[tiab] OR babies[tiab] OR toddler\*[tiab] OR minor\*[tiab] OR boys[tiab] OR boy[tiab] OR girl\*[tiab] OR kids[tiab] OR "child"[Mesh] OR child\*[tiab] OR schoolchild\*[tiab] OR "school child\*[tiab] OR Adolescent[Mesh] OR adolescen\*[tiab] OR juvenil\*[tiab] OR youth\*[tiab] OR teen\*[tiab] OR pubescen\*[tiab] OR pediatrics[Mesh] OR pediatric\*[tiab] OR peadiatric\*[tiab] OR school\*[tiab] OR prematur\*[tiab] OR preterm\*[tiab]

**3. Ultrasonography**

Ultrasonography[mesh] OR ultrasonography[tiab] OR ultrasound[tiab]

**4. Specificity/sensitivity**

"sensitivity and specificity"[mesh] OR specificity[tiab]

**5. Recurrence**

'Recurrence' OR 'recurrent'

**Search 13:** clinical questions 21

| Date       | Search strategy                                                                                                   | # records |
|------------|-------------------------------------------------------------------------------------------------------------------|-----------|
| 20-05-2020 | Thyroid cancer AND children or young adolescents AND early and late effects Filter: English, from April 2014-2020 | 76        |

**1. Thyroid cancer**

“Thyroid neoplasms”[mesh] OR “thyroid carcinoma”[tiab]OR “thyroid cancer”[tiab] OR “papillary thyroid carcinoma”[tiab] OR “follicular thyroid carcinoma”[tiab] OR “papillary thyroid cancer”[tiab] OR “PTC”[tiab] OR “DTC”[tiab] OR “follicular thyroid cancer”[tiab] OR “thyroid neoplasm”[tiab] OR “thyroid gland”[tiab] OR “thyroid adenoma”[tiab] OR “thyroid nodule”[tiab] NOT graves[tiab] NOT medullary[tiab]

**2. Children or young adolescents**

Infant[Mesh] OR infan\*[tiab] OR "Infant, Newborn"[Mesh]OR newborn\*[tiab] OR perinat\*[tiab] OR neonat\*[tiab] OR baby\*[tiab] OR babies[tiab] OR toddler\*[tiab] OR minor\*[tiab] OR boys[tiab] OR boy[tiab] OR girl\*[tiab] OR kids[tiab] OR “child”[Mesh] OR child\*[tiab] OR schoolchild\*[tiab] OR “school child”[tiab] OR Adolescent[Mesh] OR adolescen\*[tiab] OR juvenil\*[tiab] OR youth\*[tiab] OR teen\*[tiab] OR pubescen\*[tiab] OR pediatrics[Mesh] OR pediatric\*[tiab] OR peadiatric\*[tiab] OR school\*[tiab] OR prematur\*[tiab] OR preterm\*[tiab]

**3. Early and late adverse effects**

“iodine radioisotopes/adverse effects”[mesh] OR “bone marrow/radiation effects”[mesh] OR “fertility/radiation effects”[mesh] OR “salivary glands/radiation effects”[mesh] OR “salivary gland”[title] OR “fertility”[title] OR “quality of life/psychology”[mesh] OR “psychosocial”[title] OR “cardiovascular”[title] OR bone[title] OR “adverse effect”[title]

**Search 14:** clinical questions 22

| Date       | Search strategy                                                                                      | # records |
|------------|------------------------------------------------------------------------------------------------------|-----------|
| 20-05-2020 | A.Thyroid cancer AND children AND Genetic syndromes Filter:<br>English, Humans, from April 2014-2020 | 89        |

**1. Thyroid cancer**

“Thyroid neoplasms”[mesh] OR “thyroid carcinoma”[tiab]OR “thyroid cancer”[tiab] OR “papillary thyroid carcinoma”[tiab] OR “follicular thyroid carcinoma”[tiab] OR “papillary thyroid cancer”[tiab] OR “PTC”[tiab] OR “DTC”[tiab] OR “follicular thyroid cancer”[tiab] OR “thyroid neoplasm”[tiab] OR “thyroid gland”[tiab] OR “thyroid adenoma”[tiab] OR “thyroid nodule”[tiab] NOT graves[tiab] NOT medullary[tiab]

**2. Children or young adolescents**

Infant[Mesh] OR infan\*[tiab] OR "Infant, Newborn"[Mesh]OR newborn\*[tiab] OR perinat\*[tiab] OR neonat\*[tiab] OR baby\*[tiab] OR babies[tiab] OR toddler\*[tiab] OR minor\*[tiab] OR boys[tiab] OR boy[tiab] OR girl\*[tiab] OR kids[tiab] OR “child”[Mesh] OR child\*[tiab] OR schoolchild\*[tiab] OR “school child”[tiab] OR Adolescent[Mesh] OR adolescen\*[tiab] OR juvenil\*[tiab] OR youth\*[tiab] OR teen\*[tiab] OR pubescen\*[tiab] OR pediatrics[Mesh] OR pediatric\*[tiab] OR peadiatric\*[tiab] OR school\*[tiab] OR prematur\*[tiab] OR preterm\*[tiab]

**3. Genetic syndromes**

“DICER1”[tiab] OR “cowden”[tiab] OR FAP[Title] OR “familial adenomatous polyposis”[Title] OR Lynch syndrome[Tiab] OR “carney complex”[tiab] OR “genetic predisposition to disease”[mesh] OR “neoplastic syndromes, hereditary/genetics”[mesh]

**Search 15:** clinical questions 23

| Date | Search strategy | # records |
|------|-----------------|-----------|
|------|-----------------|-----------|

|            |                                                                                                    |    |
|------------|----------------------------------------------------------------------------------------------------|----|
| 20-05-2020 | B.Thyroid cancer AND children AND radiation exposure Filter: English, Humans, from April 2014-2020 | 39 |
|------------|----------------------------------------------------------------------------------------------------|----|

### 1. Thyroid cancer

"Thyroid neoplasms"[mesh] OR "thyroid carcinoma"[tiab]OR "thyroid cancer"[tiab] OR "papillary thyroid carcinoma"[tiab] OR "follicular thyroid carcinoma"[tiab] OR "papillary thyroid cancer"[tiab] OR "PTC"[tiab] OR "DTC"[tiab] OR "follicular thyroid cancer"[tiab] OR "thyroid neoplasm"[tiab] OR "thyroid gland"[tiab] OR "thyroid adenoma"[tiab] OR "thyroid nodule"[tiab] NOT graves[tiab] NOT medullary[tiab]

### 2. Children or young adolescents

Infant[Mesh] OR infan\*[tiab] OR "Infant, Newborn"[Mesh]OR newborn\*[tiab] OR perinat\*[tiab] OR neonat\*[tiab] OR baby\*[tiab] OR babies[tiab] OR toddler\*[tiab] OR minor\*[tiab] OR boys[tiab] OR boy[tiab] OR girl\*[tiab] OR kids[tiab] OR "child"[Mesh] OR child\*[tiab] OR schoolchild\*[tiab] OR "school child\*[tiab] OR Adolescent[Mesh] OR adolescen\*[tiab] OR juvenil\*[tiab] OR youth\*[tiab] OR teen\*[tiab] OR pubescen\*[tiab] OR pediatrics[Mesh] OR pediatric\*[tiab] OR peadiatric\*[tiab] OR school\*[tiab] OR prematur\*[tiab] OR preterm\*[tiab]

### 3. Radiation exposure

"Neoplasms, Radiation-Induced/etiology"[mesh]
