# Supplementary material for: 2022 European Thyroid Association Guidelines for the management of pediatric thyroid nodules and differentiated thyroid carcinoma
Source: PubMed Central journal article supplement — Eur Thyroid J. 2022 Oct 13;11(6):e220146. doi: 10.1530/ETJ-22-0146 (PMC9716393; doi:10.1530/etj-22-0146), 2022-10-13
Supplement: supplementary_table_3.pdf [file supplementary_table_3.pdf]

**2022 ETA Guidelines for the Management of Pediatric Thyroid Nodules and Differentiated Thyroid Carcinoma**

Appendix C Summary tables

**Summary table Clinical question 1.**  
**What is the sensitivity and specificity of thyroid ultrasound for distinction of thyroid cancer from a benign thyroid nodule of a child?**

| Study (n=5)                    | No. of participants | Age patients (mean±SD/median (range)) (yrs) | Minimum size thyroid nodule | Ultrasound characteristics                                                                                                                                                                                                                                            | Sensitivity of US                                                                                                                                                                                                                                                                                                                                                                                                | Specificity of US                                                                                                                                                                                                                                                                                                                                                                                                    |
|--------------------------------|---------------------|---------------------------------------------|-----------------------------|-----------------------------------------------------------------------------------------------------------------------------------------------------------------------------------------------------------------------------------------------------------------------|------------------------------------------------------------------------------------------------------------------------------------------------------------------------------------------------------------------------------------------------------------------------------------------------------------------------------------------------------------------------------------------------------------------|----------------------------------------------------------------------------------------------------------------------------------------------------------------------------------------------------------------------------------------------------------------------------------------------------------------------------------------------------------------------------------------------------------------------|
| <b>Richman (2018) 29714678</b> | 314 (404 nodules)   | 14.9                                        | NS                          | Solitary<br>Taller-than-wide shape<br>Solid<br>Hypoechoogenicity<br>Lack of smooth margin<br>Any calcifications<br>Speckled calcifications alone<br>Abnormal lymph node<br><br>(percentage (95% CI))                                                                  | Solitary: 74.0% (63.6-83.1)<br>Taller-than-wide shape: 26.4% (17.0-38.3)<br>Solid: 75.3% (64.0-84.1)<br>Hypoechoogenicity: 63.0% (50.9-73.8)<br>Lack of smooth margin: 59.7% (47.9-70.6)<br>Any calcifications: 63.6% (51.8-74.2)<br>Speckled calcifications alone: 58.4% (46.6-69.4)<br>Abnormal lymph node: 36.5% (25.8-48.5)                                                                                  | Solitary: 58.1% (52.5-63.5)<br>Taller-than-wide shape: 92.3 (88.7-94.9%)<br>Solid: 75.2% (70.1-79.7)<br>Hypoechoogenicity: 50.2% (43.5-56.9)<br>Lack of smooth margin: 94.1% (90.9-96.4)<br>Any calcifications: 89.2% (85.3-92.3)<br>Speckled calcifications alone: 93.3% (89.8-95.6)<br>Abnormal lymph node: 96.7% (93.2-98.4)                                                                                      |
| <b>Creo (2019) 30326152</b>    | 99 (131 nodules)    | 15.4 ± 3.8                                  | NS                          | Hypoechoogenicity (+1),<br>Increased vascularity (+1)<br>Taller than wide (+1)<br>Coarse (+1) or microcalcification (+2)<br>Enlarging (>10% (+1), >30% (+2))<br>Abnormal lymph nodes (+2)<br>Size (2-2.9 (+2), 3-3.9 (+3). 4+ (+4))                                   | ≥2 points 93.2%<br>≥3 points 77.3%<br>≥4 points 56.8%                                                                                                                                                                                                                                                                                                                                                            | ≥2 points 41.4%<br>≥3 points 70.1%<br>≥4 points 87.4%                                                                                                                                                                                                                                                                                                                                                                |
| <b>Gannon (2018) 29546281</b>  | 152 (241 nodules)   | 14.2 ± 3.8                                  | ≥ 0.5 cm                    | Nodule size >1 cm<br>≤ 25% solid nodule composition<br>Nonisoechoic echogenicity<br>Taller-than-wide shape<br>Increased Doppler flow<br>Calcifications<br>Infiltrative/microlobular margin<br>Extrathyroidal extension<br>All features combined (percentage (95% CI)) | Nodule size >1 cm: 81% (71-89.1)<br>≤ 25% solid nodule composition: 85% (75.3-92)<br>Nonisoechoic echogenicity: 83.5 (73.5-90.9)<br>Taller-than-wide shape: 21.2% (12.9-31.8)<br>Increased Doppler flow: 90.9% (82.2-96.3)<br>Calcifications: 60.0% (48.4-70.8)<br>Infiltrative/microlobular margin: 51.9% (40.4-63.3)<br>Extrathyroidal extension: 16.2% (8.9-26.2)<br>All features combined: 58.7% (46.7-69.9) | Nodule size >1 cm: 32.1% (24.8-40)<br>≤ 25% solid nodule composition: 46.2% (38.2-54.3)<br>Nonisoechoic echogenicity: 52.6% (44.4-60.8)<br>Taller-than-wide shape: 89.7% (83.9-94.0)<br>Increased Doppler flow: 25.9% (19-33.7)<br>Calcifications: 85.8% (79.3-90.9)<br>Infiltrative/microlobular margin: 89.1 (83.1-93.5)<br>Extrathyroidal extension: 98.1 (94.5-99.6)<br>All features combined: 91.6% (85.8-95.6) |

|                                 |                                                                                                                              |                                     |          |                                                                                                                                    |                                                                                                                                                                                                                                                                                                                                                                                                                                                                                                                                                                                                                                                                                                                          |                                                                                                                                                                                                                                                                                                                                                                                                                                                                                                                                                                                                                                                                                                                           |
|---------------------------------|------------------------------------------------------------------------------------------------------------------------------|-------------------------------------|----------|------------------------------------------------------------------------------------------------------------------------------------|--------------------------------------------------------------------------------------------------------------------------------------------------------------------------------------------------------------------------------------------------------------------------------------------------------------------------------------------------------------------------------------------------------------------------------------------------------------------------------------------------------------------------------------------------------------------------------------------------------------------------------------------------------------------------------------------------------------------------|---------------------------------------------------------------------------------------------------------------------------------------------------------------------------------------------------------------------------------------------------------------------------------------------------------------------------------------------------------------------------------------------------------------------------------------------------------------------------------------------------------------------------------------------------------------------------------------------------------------------------------------------------------------------------------------------------------------------------|
| <b>Koltin (2016) 27089403</b>   | 27                                                                                                                           | 13.1±3.4                            | NS       | Microcalcifications, size, ill-defined margin                                                                                      | Microcalcifications and size and ill-defined margin: 80.7%<br>Microcalcifications and ill-defined margins and hypoechogenicity: 73.6%<br>Hypoechogenicity and irregular outline or type 3 vascularity or microcalcifications: 28.1%                                                                                                                                                                                                                                                                                                                                                                                                                                                                                      | Microcalcifications and size and ill-defined margin: 79.2%<br>Microcalcifications and ill-defined margins and hypoechogenicity: 75%<br>Hypoechogenicity and irregular outline or type 3 vascularity or microcalcifications: 100%                                                                                                                                                                                                                                                                                                                                                                                                                                                                                          |
| <b>Lyshchik (2005) 15770036</b> | 103<br>(Solid thyroid nodules found by screening of children and adolescents out of radiation contaminated areas of Belarus) | 14.6±2.6 (DTC)<br>14.2±2.9 (benign) | ≥ 0.5 cm | Hypoechogenicity, irregular outline, type 3 vascularity, microcalcifications, absence of halo, subcapsular location, heterogeneity | <p><i>All nodules</i><br/>Hypoechogenicity: 55.3%<br/>Irregular outline: 71.1%<br/>Type 3 vascularity: 71.1%<br/>Microcalcifications: 5.3%<br/>Absence of halo: 78.9%<br/>Subcapsular location: 76.3%<br/>Heterogeneity: 73.7%</p> <p><i>Nodule size ≤15mm:</i><br/>Hypoechogenicity: 52.2%<br/>Irregular outline: 69.6%<br/>Type 3 vascularity: 69.6%<br/>Microcalcifications: 8.7%<br/>Absence of halo: 82.6%<br/>Subcapsular location: 65.2%<br/>Heterogeneity: 69.6%</p> <p><i>Nodule size &gt;15 mm:</i><br/>Hypoechogenicity: 60.0%<br/>Irregular outline: 73.3%<br/>Type 3 vascularity: 73.3%<br/>Microcalcifications: NA<br/>Absence of halo: 73.3%<br/>Subcapsular location: 93.3%<br/>Heterogeneity: 80.0%</p> | <p><i>All nodules</i><br/>Hypoechogenicity: 64.8%<br/>Irregular outline: 80.2%<br/>Type 3 vascularity: 97.8%<br/>Microcalcifications: 96.7%<br/>Absence of halo: 38.5%<br/>Subcapsular location: 63.7%<br/>Heterogeneity: 39.6%</p> <p><i>Nodule size ≤15mm:</i><br/>Hypoechogenicity: 57.6%<br/>Irregular outline: 86.4%<br/>Type 3 vascularity: 87.9%<br/>Microcalcifications: 98.5%<br/>Absence of halo: 40.9%<br/>Subcapsular location: 86.4%<br/>Heterogeneity: 47.0%</p> <p><i>Nodule size &gt;15 mm:</i><br/>Hypoechogenicity: 84.0%<br/>Irregular outline: 64.0%<br/>Type 3 vascularity: 52.0%<br/>Microcalcifications: NA<br/>Absence of halo: 32.0%<br/>Subcapsular location: 4.0%<br/>Heterogeneity: 20.0%</p> |

|                                                                                                                                                                                                                                              |                                                                       |
|----------------------------------------------------------------------------------------------------------------------------------------------------------------------------------------------------------------------------------------------|-----------------------------------------------------------------------|
| <b>GRADE assessment:</b>                                                                                                                                                                                                                     |                                                                       |
| Study design:                                                                                                                                                                                                                                | +4 <i>Observational evidence for a diagnostic question</i>            |
| Study limitations:                                                                                                                                                                                                                           | 0 <i>Limitations; low of bias (blinded assessment in all studies)</i> |
| Consistency:                                                                                                                                                                                                                                 | -1 <i>Inconsistency between studies</i>                               |
| Directness:                                                                                                                                                                                                                                  | -1 <i>Indirectness; major variability in presented results</i>        |
| Precision:                                                                                                                                                                                                                                   | 0 <i>No important imprecision</i>                                     |
| Publication bias:                                                                                                                                                                                                                            | 0 <i>Unlikely</i>                                                     |
| Effect size:                                                                                                                                                                                                                                 | +1 <i>Strong evidence of association</i>                              |
| Dose-response:                                                                                                                                                                                                                               | 0 <i>NA</i>                                                           |
| Plausible confounders                                                                                                                                                                                                                        | 0 <i>NA</i>                                                           |
| Quality of evidence: ⊕⊕⊕⊖ ( <b>Moderate</b> )                                                                                                                                                                                                |                                                                       |
| Conclusion:                                                                                                                                                                                                                                  |                                                                       |
| The sensitivity of thyroid ultrasound for distinction of thyroid cancer from a benign thyroid nodule in children depends on multiple ultrasound characteristics. The sensitivity of the following ultrasound characteristics varies between: |                                                                       |
| Hypo echogenicity: 52.2-63.0% (2 studies)                                                                                                                                                                                                    |                                                                       |
| Calcifications: 5.3-63.6% (3 studies)                                                                                                                                                                                                        |                                                                       |
| Taller-than-wide shape: 21.2-26.4% (2 studies)                                                                                                                                                                                               |                                                                       |
| Irregular margin: 51.9-73.3% (3 studies)                                                                                                                                                                                                     |                                                                       |
| Increased vascularization: 69.9-90.9% (2 studies)                                                                                                                                                                                            |                                                                       |
| Features combined (depending on study): 28.1-93.2% (3 studies)                                                                                                                                                                               |                                                                       |
| The specificity of thyroid ultrasound for distinction of thyroid cancer from a benign thyroid nodule in children depends on multiple ultrasound characteristics. The specificity of the following ultrasound characteristics varies between: |                                                                       |
| Hypo echogenicity: 50.2-84.0% (2 studies)                                                                                                                                                                                                    |                                                                       |
| Calcifications: 89.2-98.5% (3 studies)                                                                                                                                                                                                       |                                                                       |
| Taller-than-wide shape: 89.7-92.3% (2 studies)                                                                                                                                                                                               |                                                                       |
| Irregular margin: 80.2-94.4% (3 studies)                                                                                                                                                                                                     |                                                                       |
| Increased vascularization: 25.9-97.8% (2 studies)                                                                                                                                                                                            |                                                                       |
| Features combined (depending on study): 41.4-100% (3 studies)                                                                                                                                                                                |                                                                       |
| Abbreviations: US, ultrasound; SD, standard deviation; IQR, interquartile range; yr, year; NS, not specified; CI, confidence interval; AB, attrition bias; CI, confidence interval; CF, confounding; DB, detection bias; SB, selection bias  |                                                                       |

| <b>Summary table Clinical question 9.<br/>What is the prevalence of non-clinical relevant thyroid nodules in a child (non-childhood cancer survivors)?</b>                                          |                            |                                                                                                                                                                                                                                                                                                                                                                           |                                                             |                          |                                                                  |
|-----------------------------------------------------------------------------------------------------------------------------------------------------------------------------------------------------|----------------------------|---------------------------------------------------------------------------------------------------------------------------------------------------------------------------------------------------------------------------------------------------------------------------------------------------------------------------------------------------------------------------|-------------------------------------------------------------|--------------------------|------------------------------------------------------------------|
| <b>Study (n=3)</b>                                                                                                                                                                                  | <b>No. of participants</b> | <b>Characteristics participants</b>                                                                                                                                                                                                                                                                                                                                       | <b>Age at diagnosis thyroid nodule (mean/median, range)</b> | <b>Mode of detection</b> | <b>Prevalence non clinical relevant thyroid nodules</b>          |
| <b>Baez (2015)<br/>26295673</b>                                                                                                                                                                     | 2525                       | Patients who had thoracic contrast enhanced CT                                                                                                                                                                                                                                                                                                                            | 13.6 ± 6.2 yrs                                              | Contrast enhanced CT     | 1.4% (95% CI 1-2%)                                               |
| <b>Calle-Toro (2019)<br/>30811014</b>                                                                                                                                                               | 324                        | Healthy infants aged 0-8 months                                                                                                                                                                                                                                                                                                                                           | Range 4-8 weeks                                             | US                       | 2%                                                               |
| <b>Suzuki (2016)<br/>27098220</b>                                                                                                                                                                   | 300.476                    | Patients living in Fukushima Prefecture at time of the nuclear accident                                                                                                                                                                                                                                                                                                   | 10.7 ± 5.0 yrs                                              | US                       | Nodule(s) >5 mm: n=2275 (0.8%)<br>Nodule(s) ≤5 mm: n=1715 (0.6%) |
| <b>GRADE assessment:</b>                                                                                                                                                                            |                            | Study design: +4 Observational evidence for a diagnostic question<br>Study limitations: 0 Low risk of bias<br>Consistency: 0 No major inconsistency between studies<br>Directness: -1 No general population<br>Precision: 0 No important imprecision<br>Publication bias: 0 Unlikely<br>Effect size: 0 NA<br>Dose-response: 0 NA<br>Plausible confounders 0 No adjustment |                                                             |                          |                                                                  |
| Quality of evidence: ⊕⊕⊕⊖ (Moderate quality)<br>Conclusion: The prevalence non clinical relevant thyroid nodules in a non childhood cancer survivor cohort of children seems to vary between 0.6-2% |                            |                                                                                                                                                                                                                                                                                                                                                                           |                                                             |                          |                                                                  |
| Abbreviations: AB, attrition bias; CI, confidence interval; CF, confounding; DB, detection bias; SB, selection bias; yrs, years; US, ultrasound                                                     |                            |                                                                                                                                                                                                                                                                                                                                                                           |                                                             |                          |                                                                  |

| Summary table Clinical Question 10.<br>What is the difference in outcome of DTC in children (with microcarcinoma) treated with a total thyroidectomy versus hemi or subtotal thyroidectomy? |                                                                                                                                                                                                                                                                                                                                                                                                                                                                                           |                        |                        |                                                                                                                                                                                                                                                                                    |                                                                                                                                                                                                                                                                                                                                                                                                                                                                                                                                                                                                  |                                                                                                                                                                                                                  |
|---------------------------------------------------------------------------------------------------------------------------------------------------------------------------------------------|-------------------------------------------------------------------------------------------------------------------------------------------------------------------------------------------------------------------------------------------------------------------------------------------------------------------------------------------------------------------------------------------------------------------------------------------------------------------------------------------|------------------------|------------------------|------------------------------------------------------------------------------------------------------------------------------------------------------------------------------------------------------------------------------------------------------------------------------------|--------------------------------------------------------------------------------------------------------------------------------------------------------------------------------------------------------------------------------------------------------------------------------------------------------------------------------------------------------------------------------------------------------------------------------------------------------------------------------------------------------------------------------------------------------------------------------------------------|------------------------------------------------------------------------------------------------------------------------------------------------------------------------------------------------------------------|
| Study (n=12)                                                                                                                                                                                | No. of participants                                                                                                                                                                                                                                                                                                                                                                                                                                                                       | Age participants (yrs) | Follow-up time (yrs)   | Surgery                                                                                                                                                                                                                                                                            | Main outcome                                                                                                                                                                                                                                                                                                                                                                                                                                                                                                                                                                                     | Our conclusion                                                                                                                                                                                                   |
| <b>Sugino (2015) 25802237</b>                                                                                                                                                               | 227                                                                                                                                                                                                                                                                                                                                                                                                                                                                                       | mean 18 (7-20)         | Median 12.9 (1.3-35.2) | TT: n=69 (30.4%)<br>Less than TT: n=158 (69.6%)<br><br><i>(no definition of less TT mentioned)</i>                                                                                                                                                                                 | Prognostic factors DFS<br>Univariate analysis<br>TT: OR 2.29, 95%CI 1.150–4.330, p<0.05<br><br>Multivariate analysis<br>TT: OR 1.40, 95%CI 0.678-2.760, not significant<br><i>Preoperative LNM OR 3.80, 95%CI 1.920–2.625 p&lt;0.001</i><br><i>Extrathyroidal invasion OR 1.75 95%CI 1.094–2.625 p&lt;0.05</i><br><br><i>(variable RAI not in uni/multivariate analysis)</i>                                                                                                                                                                                                                     | In a univariate analysis, TT might be superior to less than TT with respect to DFS. In a multivariate analyses no differences were found between treatment groups.                                               |
| <b>Sugino (2020) 31910105</b>                                                                                                                                                               | 153<br><br>LR: n=117 ( <i>no risk factors</i> )<br>IR: n=33 ( <i>1 risk factor</i> )<br>HR: n=3 ( <i>2 risk factors</i> )<br><br><i>Risk levels based on preoperatively cN and gross ETE based on imaging/clinical features.</i><br><br><i>Clinically apparent nodal disease diagnosed by preoperative physical examination, US, FNABC, and intraoperative inspection was defined as clinical N1 (cN1), whereas no clinically apparent nodal disease was defined as clinical N0 (cN0)</i> | Median 16 (7-18)       | Median 14.8 (1.1-37.9) | TT: n=37 (24.2%)<br>Less than TT: n=116 (75.8%)<br><br><i>(no definition of less TT mentioned)</i><br><br>LND<br><i>No dissection: n=26 (17%)</i><br>CND<br><i>(therapeutic/profylactic): n=33 (21.6%) (3/30)</i><br>MND<br><i>(therapeutic/profylactic): n=94 (61.4%) (27/67)</i> | RF associated with DFS: cN1 and ETE (multivariate) ( <i>RAI not in multivariate analysis</i> )<br><br>10-yr DFS (LR, IR, HR): 82.4%, 55.7% and 0%<br>20-yr DFS (LR, IR, HR): 81.8%, 40.6%, and 0%<br><br>DFS in the LR patients treated by lobectomy (n=102) was not significantly inferior to that in the patients treated by TT (N=15). ( <i>no numbers shown</i> )<br><br>Prediction of recurrence according risk stratification:<br>Low risk: ref<br>Intermediate: 5.3 (2.51-11.03)<br>High: 101.5 (18.8-498.8)<br><i>(excluding data of metastatic lymph nodes diagnosed after surgery)</i> | Disease free survival in low patients without clinically apparent nodal disease and without gross extra thyroidal extension treated by lobectomy does not seem to be inferior to that in patients treated by TT. |

|                                                               |                                    |                                      |                                                 |                                                                                       |                                                                                                                                                                                                                                                                                                      |                                                                                                                              |
|---------------------------------------------------------------|------------------------------------|--------------------------------------|-------------------------------------------------|---------------------------------------------------------------------------------------|------------------------------------------------------------------------------------------------------------------------------------------------------------------------------------------------------------------------------------------------------------------------------------------------------|------------------------------------------------------------------------------------------------------------------------------|
| <b>Qu (2016)</b><br><b>26695148</b><br><b>(meta-analysis)</b> | 146                                | Mean<br>16.2± 3.1                    | Mean 5.7<br>(0.5-24.3)                          | TT: n=67 (45.9%)<br>Lobectomy+isthmectomy (L):<br>n=79 (54.1%)                        | RF for recurrence:<br>Extent of thyroidectomy<br>HR 0.978 (95%CI 0.471-2.032)<br>(p=0.952) (univariate)<br>HR 0.417 (95%CI 0.044-3.959)<br>(p=0.446) (multivariate)<br><br><i>(variable RAI in uni/multivariate analysis)</i>                                                                        | Extent of thyroidectomy does not seem to be associated with the risk of recurrence.                                          |
| <b>Bal (2015)</b><br><b>25210762</b>                          | 53                                 | Median 16<br>(6-21)                  | Median 6.0                                      | TT: n=45 (85%)<br>sTT: n=7 (13%)<br>no surgery: n=1 (2%)                              | Prognostic factors remission<br>Univariate<br>TT vs sTT/no surgery: OR 5.83, 95%CI 1.18-28.74, p=0.03<br><br>Multivariate<br>TT vs sTT/no surgery: OR 10.17, 95%CI 1.29-80.27, p=0.028<br><br><i>(variable RAI not in uni/multivariate analysis; All patients received post-surgery RAI therapy)</i> | TT might be a prognostic factor for remission (found in as well in a univariate analysis as well in a multivariate analysis) |
| <b>Spinelli (2019)</b><br><b>29935896</b>                     | 30 (FTC)                           | Mean<br>13.73 ± 3.83<br>(range 5-18) | 6.1 ± 2.9<br>(0.5–10)                           | HT: n=21<br>Completion of thyroidectomy (CT): n=11 (11/21)<br>TT: n= 9                | Incidence of recurrence: no recurrence of disease or after-surgery relapse in all patients<br><br>OS: 100%                                                                                                                                                                                           | No significant differences in incidence of recurrence and OS between treatment groups                                        |
| <b>Olmsted (2017)</b><br><b>28902626</b>                      | 81                                 | <21                                  | 31.7 (inter-quartile range [IQR]=27.9–37.3)     | TT: n= 64<br>Lesser than TT: n= 17                                                    | RFS: TT vs less than total p=0.2                                                                                                                                                                                                                                                                     | No significant differences in recurrence free survival between treatment groups.                                             |
| <b>Nice (2015)</b><br><b>25819020</b>                         | 3861                               | Mean 17.6 ± 3.3 SD                   | Median follow-up was 6.9 with a maximum of 14.9 | Total thyroidectomy (TT): n=3474 (90.0%)<br>Partial thyroidectomy (PT): n=387 (10.0%) | Estimated 15-yr overall survival 96.10% after TT and 96.18% after PT (p=0.0855)<br><br>Survival for patients undergoing TT was not statistically improved over those undergoing PT (HR 0.81, p=0.694)                                                                                                | No significant differences in OS between treatment groups.                                                                   |
| <b>Balachandar (2016)</b><br><b>26854950</b>                  | 62 (n=55 follow-up data available) | Median 13.8<br>(range 2.7-18.9)      | 4.0 (0.0–14.8)                                  | TT: n=57 (91.9%)<br>sTT: n=5 (8.1%)                                                   | Disease status last moment of follow-up:<br>TT<br>NED: n=39 (75.0%)<br>PD: n=10 (19.2%)<br>RPD: n=3 (5.8%)                                                                                                                                                                                           | No statistical analysis on differences in disease status at last moment of follow-up between treatment groups.               |

|                                              |                                                            |                         |                                                    |                                                                                                                                                          |                                                                                                                                                                                                                    |                                                                                                                                                                                                |
|----------------------------------------------|------------------------------------------------------------|-------------------------|----------------------------------------------------|----------------------------------------------------------------------------------------------------------------------------------------------------------|--------------------------------------------------------------------------------------------------------------------------------------------------------------------------------------------------------------------|------------------------------------------------------------------------------------------------------------------------------------------------------------------------------------------------|
|                                              |                                                            |                         |                                                    |                                                                                                                                                          | sTT<br>NED: n=3 (100%)<br><br>Event-free survival was not associated with TT (p=0.35 [log rank test])                                                                                                              | No association of TT with event-free survival                                                                                                                                                  |
| <b>Palaniappan (2018)</b><br><b>30147104</b> | 67                                                         | Mean 16.8               | Median 8.7 (2.1–19.6)                              | HT: n= 7<br>HT followed by completion thyroidectomy: n=11<br>TT with CCND: n=9<br>TT with CCND + unilateral LND: n=33<br>TT with CCND+bilateral LND: n=7 | 5-yr DFS: 100% (HT), 84.2% (TT)<br>10-yr DFS: 85.7% (HT), 81% (TT)<br><br>Univariate analysis OS: HR 0.689 (HT), 1.000 (TT) (p=0.72)<br><i>No multivariate analysis has been performed.</i>                        | No statistical analysis on differences in disease free survival between treatment groups.<br><br>Univariate analysis does not show a difference in OS between treatment groups                 |
| <b>Zong (2018)</b><br><b>30282585</b>        | 35 (n=13 unilateral TC)                                    | Median 9.5 (range 4-14) | 3.75 (1.2-4.3) (lobectomy)<br><br>3.8 (1.3–7) (TT) | Lobectomy: n=6<br>TT: n=7                                                                                                                                | Recurrence: lobectomy: n=2 (33.3%); TT: n=1 (14.3%)<br>OS: lobectomy=100%; TT= 100%<br>There was no statistically significant difference in recurrence and survival rate between two groups by Fisher's exact test | No significant difference in recurrence and survival rate between treatment groups.                                                                                                            |
| <b>Mihailovic (2014)</b><br><b>24722527</b>  | 51                                                         | Mean 16.5               | 10 (1–30)                                          | TT + RAI: n=46<br>TT only: n=2<br>sTT: n=3                                                                                                               | Recurrence rate during FU<br>TT + RAI: 6/46 (13%)<br>TT only: 2/2 (100%)<br>sTT: 3/3 (100%)<br>Recurrence was significantly influenced by initial treatment (p=0.0001)                                             | A significant difference in recurrence rate was found between treatment groups: patients treated with TT + RAI showed a lower recurrence rate compared to patient treated with TT only or sTT. |
| <b>Markovina (2014)</b><br><b>24731094</b>   | 112                                                        | <22 years               | 18.1 (5.0–42.8)                                    | TT: n=1002 (91.1%)<br>sTT: n=3 (2.7%)<br>lobectomy: n=7 (6.3%)                                                                                           | Progressive free survival (PFS): no detriment in PFS for patients who underwent subtotal thyroidectomy or lobectomy.<br><br><i>(no numbers shown)</i>                                                              | No significant difference in PFS between treatment groups.                                                                                                                                     |
| <b>GRADE assessment:</b>                     |                                                            |                         |                                                    |                                                                                                                                                          |                                                                                                                                                                                                                    |                                                                                                                                                                                                |
| Study design:                                | +2 Observational evidence for intervention questions       |                         |                                                    |                                                                                                                                                          |                                                                                                                                                                                                                    |                                                                                                                                                                                                |
| Study limitations:                           | -1 Limitations; high risk of confounding                   |                         |                                                    |                                                                                                                                                          |                                                                                                                                                                                                                    |                                                                                                                                                                                                |
| Consistency:                                 | 0 Most studies show similar results                        |                         |                                                    |                                                                                                                                                          |                                                                                                                                                                                                                    |                                                                                                                                                                                                |
| Directness:                                  | 0 Population of interest                                   |                         |                                                    |                                                                                                                                                          |                                                                                                                                                                                                                    |                                                                                                                                                                                                |
| Precision:                                   | 0 No important imprecision. 4/15 show confidence intervals |                         |                                                    |                                                                                                                                                          |                                                                                                                                                                                                                    |                                                                                                                                                                                                |
| Publication bias:                            | 0 Unlikely                                                 |                         |                                                    |                                                                                                                                                          |                                                                                                                                                                                                                    |                                                                                                                                                                                                |
| Effect size:                                 | +1 Strong evidence of association                          |                         |                                                    |                                                                                                                                                          |                                                                                                                                                                                                                    |                                                                                                                                                                                                |
| Dose-response:                               | 0 NA                                                       |                         |                                                    |                                                                                                                                                          |                                                                                                                                                                                                                    |                                                                                                                                                                                                |
| Plausible confounders                        | 0 No adjustment                                            |                         |                                                    |                                                                                                                                                          |                                                                                                                                                                                                                    |                                                                                                                                                                                                |



Quality of evidence: ⊕⊕⊖⊖ (low quality)

Conclusion:

Based on the studies including risk factor analysis, total thyroidectomy might be superior subtotal thyroidectomy in children with DTC in view of disease/recurrence free survival (*univariate analysis, 1 study*). However, in a multivariate analyses no differences were found between TT and subTT (*2 studies*). Bal et al. (2015) found TT as significant prognostic factor for remission (as well in a univariate analysis as well in a multivariate analysis). (*1 study*)

Disease free survival in low patients without clinically apparent nodal disease (by preoperative physical examination, US, FNABC, and intraoperative inspection) and without gross extra thyroidal extension (based on imaging/clinical features) treated by lobectomy does not seem to be inferior to that in patients treated by TT (*1 study*).

Abbreviations: MI-FTC, minimally invasive follicular thyroid carcinoma; WI-FTC, widely invasive follicular thyroid carcinoma; yrs, year; PTC, papillary thyroid carcinoma; DTC, differentiated thyroid carcinoma; FTC, follicular thyroid carcinoma; OS, overall survival; DFS, disease-free survival; CI, confidence interval; TMC, thyroid microcarcinoma; TT, total thyroidectomy; STT, subtotal thyroidectomy; HT, hemi thyroidectomy; PT, partial thyroidectomy; DSS, disease specific survival; CND, central neck dissection; LND, lateral neck dissection; RFS, recurrence free survival; no evidence of disease (NED); persistent disease (PD); recurrent/progressive disease (RPD); AB, attrition bias; CI, confidence interval; CF, confounding; DB, detection bias; SB, selection bias

| Summary table Clinical Question 11.<br>What is the difference in outcome of DTC in children with microcarcinoma (TMC) treated with a total thyroidectomy versus hemi or subtotal thyroidectomy? |                                        |                                                                                                        |                                     |                |                                                                                                                         |                                                                                                                                                                                                                                                                                                                                                                                                                                                                                                                                      |                                                                                                                                                                                                                                                                                                                                      |
|-------------------------------------------------------------------------------------------------------------------------------------------------------------------------------------------------|----------------------------------------|--------------------------------------------------------------------------------------------------------|-------------------------------------|----------------|-------------------------------------------------------------------------------------------------------------------------|--------------------------------------------------------------------------------------------------------------------------------------------------------------------------------------------------------------------------------------------------------------------------------------------------------------------------------------------------------------------------------------------------------------------------------------------------------------------------------------------------------------------------------------|--------------------------------------------------------------------------------------------------------------------------------------------------------------------------------------------------------------------------------------------------------------------------------------------------------------------------------------|
| Study (n=2)                                                                                                                                                                                     | No. of participants                    | Age participants (yrs)                                                                                 | Tumor size                          | Follow-up time | Surgery                                                                                                                 | Outcome                                                                                                                                                                                                                                                                                                                                                                                                                                                                                                                              | Our conclusion                                                                                                                                                                                                                                                                                                                       |
| <b>Lerner (2015)<br/>25854844</b>                                                                                                                                                               | 154 TMC<br>1671 DTC>1cm                | TMC ≤19 yrs<br>(0-14, 18.2%;<br>81.8% (15-19)<br><br>DTC>1cm ≤19 yrs<br>(0-14, 24.3%;<br>75.7% (15-19) | TMC (≤ 1 cm)<br>versus DTC<br>>1 cm | 7.1 years      | TMC: PT in 29.2%<br><br>DTC >1cm: PT in 10.8%                                                                           | OR of being TMC<br>PT: OR 3.01 (95%CI 1.68-5.38, p<0.001)<br>No RAI: OR 1.89 (95%CI 1.13-3.17, p=0.016)<br><br>Overall survival (OS)<br>Mean OS TMC: 253.58 months, 95%CI 247.36–259.81<br>Mean OS DTC >1cm: 257.82 months, 95%CI 255.93–259.70 (p=0.360)<br><br>DSS<br>TMC: 256.38 months, 95%CI 251.39–261.36<br>DTC>1 cm: 260.60 months, 95%CI 259.56–261.64 (p=0.180)<br><br>Number of deceased patients<br>TMC deceased: N=4 (n=2 disease specific deaths, 1.3%)<br>DTC >1cm deceased: n=20 (n=7 disease specific deaths, 0.4%) | Patients with thyroid microcarcinoma (<1 cm) were more often treated with partial thyroidectomy and without RAI compared to patients with DTC > 1cm.<br><br>No significant differences in OS and DSS were found between patients with TMC and DTC >1cm.<br><br>No analysis of OS and DSS in TMC treatment groups has been performed. |
| <b>Golpanian (2016)<br/>26717936</b>                                                                                                                                                            | 2504 (n=2077, surgical data available) | Mean 16 (range 0-19)                                                                                   | TMC (≤ 1 cm)<br>versus DTC<br>>1 cm | Not mentioned  | Removal of less than lobe: n=22 (1.1%)<br>Lobectomy: n=174 (8.4%)<br>Subtotal thyroidectomy (sTT) or TT: n=1881 (90.6%) | Patients with <b>tumor sizes &lt;1 cm</b> more likely received lobectomies/isthmusectomies versus ST/TT [OR = 3.03 (2.12, 4.32); P < 0.001]. Patients with <b>tumors ≥1 cm</b> and lymph node-positive statuses [OR = 99.0 (12.5, 783); P < 0.001] more likely underwent subtotal/total thyroidectomy compared to lobectomy/isthmusectomy.<br>DSS not differ based on procedure type (p=0.84)<br>Regardless of the type of surgery, disease specific 5-yrs, 10-yrs, 15-yrs, and 30-yrs DSS were maintained 100%                      | Patients with thyroidmicrocarcinoma were more likely to receive lobectomies/isthmusectomies versus ST/TT.<br>No significant differences in DSS did not differ between treatment groups.<br>No analysis DSS in TMC treatment groups has been performed.                                                                               |

|                                                                                                                                                                                                                                                                                                                                                                                                                                                                  |                                                      |
|------------------------------------------------------------------------------------------------------------------------------------------------------------------------------------------------------------------------------------------------------------------------------------------------------------------------------------------------------------------------------------------------------------------------------------------------------------------|------------------------------------------------------|
| <b>GRADE assessment:</b>                                                                                                                                                                                                                                                                                                                                                                                                                                         |                                                      |
| Study design:                                                                                                                                                                                                                                                                                                                                                                                                                                                    | +2 Observational evidence for intervention questions |
| Study limitations:                                                                                                                                                                                                                                                                                                                                                                                                                                               | -1 Important limitation, high risk of selection bias |
| Consistency:                                                                                                                                                                                                                                                                                                                                                                                                                                                     | 0 Studies show similar results                       |
| Directness:                                                                                                                                                                                                                                                                                                                                                                                                                                                      | 0 Population of interest                             |
| Precision:                                                                                                                                                                                                                                                                                                                                                                                                                                                       | 0 No important imprecision.                          |
| Publication bias:                                                                                                                                                                                                                                                                                                                                                                                                                                                | 0 Unlikely                                           |
| Effect size:                                                                                                                                                                                                                                                                                                                                                                                                                                                     | 0 Strong evidence of association                     |
| Dose-response:                                                                                                                                                                                                                                                                                                                                                                                                                                                   | 0 NA                                                 |
| Plausible confounders                                                                                                                                                                                                                                                                                                                                                                                                                                            | 0 No adjustment                                      |
| Quality of evidence: ⊕⊕⊕⊕ (very low quality)                                                                                                                                                                                                                                                                                                                                                                                                                     |                                                      |
| Conclusion: No studies have looked into differences in outcome of patients with TMC treated with total thyroidectomy versus hemi or subtotal thyroidectomy. Two studies reported no differences in disease specific survival and overall survival between patients with TMC and patients with DTC >1cm, although patients with TMC were more often treated with partial thyroidectomy/ lobectomies/isthmusectomies (2 studies) and not followed by RAI (1 study) |                                                      |
| Abbreviations: DTC, differentiated thyroid carcinoma; OS, overall survival; DSS, disease specific survival; CI, confidence interval; TMC, thyroid microcarcinoma; TT, total thyroidectomy; STT, subtotal thyroidectomy; PT, partial thyroidectomy; AB, attrition bias; CI, confidence interval; CF, confounding; DB, detection bias; SB, selection bias                                                                                                          |                                                      |

## Summary table Clinical Question 12.

## What is the difference in outcome of DTC in children treated with a (prophylactic) central neck dissection versus no central neck dissection?

| Study (n=3)                           | No. of participants | Age participants (yrs) | Surgery                                                                                                                                                                                                                            | Main outcome                                                                                                                                                                                                                                                                                                                                                                                                                                                                                                                                                                                                                                                                                                                                                                                                               | Our conclusion                                                                                                                                                                                           |
|---------------------------------------|---------------------|------------------------|------------------------------------------------------------------------------------------------------------------------------------------------------------------------------------------------------------------------------------|----------------------------------------------------------------------------------------------------------------------------------------------------------------------------------------------------------------------------------------------------------------------------------------------------------------------------------------------------------------------------------------------------------------------------------------------------------------------------------------------------------------------------------------------------------------------------------------------------------------------------------------------------------------------------------------------------------------------------------------------------------------------------------------------------------------------------|----------------------------------------------------------------------------------------------------------------------------------------------------------------------------------------------------------|
| <b>Olmsted (2017)<br/>28902626</b>    | 81                  | <21 years              | LND: n=31<br>Limited node excision: n=24<br>No LND: n=26<br><br><i>TT: n= 64, lesser than TT: n= 17<br/>81.5% (n=66) of the patient received RAI</i><br><br><i>No definition of LND; unknown if prophylactic LND is mentioned.</i> | RFS: LND vs limited node excision or no LND: no difference (p=0.31)                                                                                                                                                                                                                                                                                                                                                                                                                                                                                                                                                                                                                                                                                                                                                        | No difference in recurrence free survival was found between patients treated with LND compared to limited node excision or no LND.                                                                       |
| <b>Rubinstein (2019)<br/>30361076</b> | 48                  | 17 (range 6–21)        | Total thyroidectomy with prophylactic central neck dissection (TTpCND): n=32<br><br>Total thyroidectomy with unilateral modified radical neck dissection (TTMRND): n= 16<br><br><i>Use of RAI not mentioned</i>                    | Recurrence as function of LNR (ratio metastatic LNs to number investigated LNs)<br><br>Recurrence rates of patients treated with TTMRND vs TTpCND with an LNR $\leq 0.45$ : 30.8% and 4.2%, respectively<br><br>Recurrence rates of patients treated with TTMRND vs TTpCND with an LNR $>0.45$ : 100.0% and 25.0%, respectively<br><br><i>Conclusion authors:<br/>Incorporated as a predictive tool, the LNR may be of value in improving risk stratification for recurrence in pediatric PTC by providing a quantitative metric for "minimal" or "extensive" disease and may inform clinical conversations with patients, surveillance strategies, and practice paradigms.</i><br><br><i>Suggestion to perform prophylactic CND to better stratify recurrence risk and to decide whether additional RAI is indicated.</i> | This observation suggests that an aggressive surgical approach may both simultaneously decrease the risk of recurrence and improve prognostication on patients with more advanced or aggressive disease. |

|                                                                                                                                                                                                                                                                                                                                                                                                                                                                                                                                                                    |                                                       |
|--------------------------------------------------------------------------------------------------------------------------------------------------------------------------------------------------------------------------------------------------------------------------------------------------------------------------------------------------------------------------------------------------------------------------------------------------------------------------------------------------------------------------------------------------------------------|-------------------------------------------------------|
| <b>GRADE assessment:</b>                                                                                                                                                                                                                                                                                                                                                                                                                                                                                                                                           |                                                       |
| Study design:                                                                                                                                                                                                                                                                                                                                                                                                                                                                                                                                                      | +2 Observational evidence for a intervention question |
| Study limitations:                                                                                                                                                                                                                                                                                                                                                                                                                                                                                                                                                 | -1 Limitations; high risk of selection bias           |
| Consistency:                                                                                                                                                                                                                                                                                                                                                                                                                                                                                                                                                       | -1 Inconsistency between studies                      |
| Directness:                                                                                                                                                                                                                                                                                                                                                                                                                                                                                                                                                        | 0 Population of interest                              |
| Precision:                                                                                                                                                                                                                                                                                                                                                                                                                                                                                                                                                         | 0 No important imprecision                            |
| Publication bias:                                                                                                                                                                                                                                                                                                                                                                                                                                                                                                                                                  | 0 Unlikely                                            |
| Effect size:                                                                                                                                                                                                                                                                                                                                                                                                                                                                                                                                                       | 0 No strong evidence of association                   |
| Dose-response:                                                                                                                                                                                                                                                                                                                                                                                                                                                                                                                                                     | 0 NA                                                  |
| Plausible confounders                                                                                                                                                                                                                                                                                                                                                                                                                                                                                                                                              | 0 No adjustment                                       |
| Quality of evidence: ⊕⊖⊖⊖ (Very low quality)                                                                                                                                                                                                                                                                                                                                                                                                                                                                                                                       |                                                       |
| Conclusion: Conflicting results were found. One study suggests that an aggressive surgical approach may both simultaneously decrease the risk of recurrence and improve prognostication on patients with more advanced or aggressive disease. Another study showed no difference in recurrence free survival between patients treated with lymph node dissection (LND) compared to limited node excision of no LND. However, location of LND was not specified in this study. It remains unclear if these patients underwent prophylactic central LND. (2 studies) |                                                       |
| Abbreviations: CCLN, central compartment lymph nodes; yrs, year; TTpCND, total thyroidectomy with prophylactic central neck dissection; TTMRND, total thyroidectomy with unilateral modified radical neck dissection; TT, total thyroidectomy; LND, lateral neck dissection; LC, lateral compartment; CC, central compartment; AB, attrition bias; CI, confidence interval; CF, confounding; DB, detection bias; SB, selection bias                                                                                                                                |                                                       |

| Summary table Clinical Question 15.<br>Is rhTSH effective and safe in children during treatment with I-131?                                                                                                                                                                  |                                                                                                  |                                                                                                   |                                                       |                                                                                                                                                              |                  |                                                                                                                                                                                                                                                                                                                                                                                                                                                                                                                                                                                                                                                                                                                                                  |
|------------------------------------------------------------------------------------------------------------------------------------------------------------------------------------------------------------------------------------------------------------------------------|--------------------------------------------------------------------------------------------------|---------------------------------------------------------------------------------------------------|-------------------------------------------------------|--------------------------------------------------------------------------------------------------------------------------------------------------------------|------------------|--------------------------------------------------------------------------------------------------------------------------------------------------------------------------------------------------------------------------------------------------------------------------------------------------------------------------------------------------------------------------------------------------------------------------------------------------------------------------------------------------------------------------------------------------------------------------------------------------------------------------------------------------------------------------------------------------------------------------------------------------|
| Study (n=3)                                                                                                                                                                                                                                                                  | No. of participants                                                                              | Age participants (yrs)                                                                            | Indication rhTSH                                      | Objectives/definitions                                                                                                                                       | Dose rhTSH       | Main outcome                                                                                                                                                                                                                                                                                                                                                                                                                                                                                                                                                                                                                                                                                                                                     |
| <b>Iorcansky (2005) 16174712</b>                                                                                                                                                                                                                                             | 53 (19 patients received rhTSH injection)<br><br>Numbers of patients per age group are not shown | rhTSH patients: mean 13.6 ± 3.4 (range 7-18)<br><br>controls: mean 13.6 ± 3.7 (range 4.6-18)      | Children with TC who underwent RAI WBS                | TSH elevation (withdrawal levothyroxine therapy vs rhTSH)<br><br>rhTSH dosing regimen: children vs adults<br><br>rhTSH in different age groups<br><br>Safety | 0.9 mg (x2) i.m. | Withdrawal levothyroxine therapy vs rhTSH (188+/-118 mIU/l (range, 110 – 452 mIU/l) vs 134+/-75 mIU/l (range, 32–290 mIU/liter)), no significant difference (p=0.07)<br><br>The mean TSH levels achieved in children after rhTSH injections are remarkably similar to values previously reported in adults despite marked differences in clinical characteristics between children and adults.<br><br>No significant differences were seen in the mean serum TSH levels at the time of RAI administration after two consecutive rhTSH injections in children (<13 yrs) (187 ± 107 mIU/l), young teenagers (13-15 yrs) (88 ± 71 mIU/l), and older teenagers (15-18 yrs)(130 ± 76 mIU/l).<br><br>No significant adverse side effects were reported |
| <b>Rosario (2012) 22236503</b>                                                                                                                                                                                                                                               | 12                                                                                               | Median 12.0                                                                                       | Children who underwent RAI treatment after TT for DTC | TSH levels after rhTSH<br><br>Safety                                                                                                                         | 0.9 mg (x2) i.m. | TSH levels >50 mIU/l were achieved in all patients<br><br>No significant adverse side effects were reported                                                                                                                                                                                                                                                                                                                                                                                                                                                                                                                                                                                                                                      |
| <b>Hoe (2006) 16509525</b>                                                                                                                                                                                                                                                   | 7                                                                                                | Range 6-14                                                                                        | Children with TC who underwent RAI WBS                | TSH levels after rhTSH                                                                                                                                       | 0.9 mg (x2) i.m. | Serum TSH levels 224 ± 93 mIU/l (mean, SD)<br><br>No significant adverse side effects were reported in the patients undergoing rhTSH stimulation                                                                                                                                                                                                                                                                                                                                                                                                                                                                                                                                                                                                 |
| <b>GRADE assessment:</b>                                                                                                                                                                                                                                                     |                                                                                                  |                                                                                                   |                                                       |                                                                                                                                                              |                  |                                                                                                                                                                                                                                                                                                                                                                                                                                                                                                                                                                                                                                                                                                                                                  |
| Study design:                                                                                                                                                                                                                                                                |                                                                                                  | +2 Observational evidence for an intervention question                                            |                                                       |                                                                                                                                                              |                  |                                                                                                                                                                                                                                                                                                                                                                                                                                                                                                                                                                                                                                                                                                                                                  |
| Study limitations:                                                                                                                                                                                                                                                           |                                                                                                  | 0 Low risk of bias                                                                                |                                                       |                                                                                                                                                              |                  |                                                                                                                                                                                                                                                                                                                                                                                                                                                                                                                                                                                                                                                                                                                                                  |
| Consistency:                                                                                                                                                                                                                                                                 |                                                                                                  | 0 No inconsistency between studies                                                                |                                                       |                                                                                                                                                              |                  |                                                                                                                                                                                                                                                                                                                                                                                                                                                                                                                                                                                                                                                                                                                                                  |
| Directness:                                                                                                                                                                                                                                                                  |                                                                                                  | 0 Population of interest                                                                          |                                                       |                                                                                                                                                              |                  |                                                                                                                                                                                                                                                                                                                                                                                                                                                                                                                                                                                                                                                                                                                                                  |
| Precision:                                                                                                                                                                                                                                                                   |                                                                                                  | 0 No important imprecision ( <i>However, two studies with relatively few number of patients</i> ) |                                                       |                                                                                                                                                              |                  |                                                                                                                                                                                                                                                                                                                                                                                                                                                                                                                                                                                                                                                                                                                                                  |
| Publication bias:                                                                                                                                                                                                                                                            |                                                                                                  | 0 Unlikely                                                                                        |                                                       |                                                                                                                                                              |                  |                                                                                                                                                                                                                                                                                                                                                                                                                                                                                                                                                                                                                                                                                                                                                  |
| Effect size:                                                                                                                                                                                                                                                                 |                                                                                                  | 0 NA                                                                                              |                                                       |                                                                                                                                                              |                  |                                                                                                                                                                                                                                                                                                                                                                                                                                                                                                                                                                                                                                                                                                                                                  |
| Dose-response:                                                                                                                                                                                                                                                               |                                                                                                  | 0 NA                                                                                              |                                                       |                                                                                                                                                              |                  |                                                                                                                                                                                                                                                                                                                                                                                                                                                                                                                                                                                                                                                                                                                                                  |
| Plausible confounders                                                                                                                                                                                                                                                        |                                                                                                  | 0 No adjustment                                                                                   |                                                       |                                                                                                                                                              |                  |                                                                                                                                                                                                                                                                                                                                                                                                                                                                                                                                                                                                                                                                                                                                                  |
| Quality of evidence: ⊕⊕⊕⊕ (low quality)                                                                                                                                                                                                                                      |                                                                                                  |                                                                                                   |                                                       |                                                                                                                                                              |                  |                                                                                                                                                                                                                                                                                                                                                                                                                                                                                                                                                                                                                                                                                                                                                  |
| Conclusion All studies reported TSH levels after rhTSH stimulation of > 50mIU. No significant side effects were reported. No studies reported on iodine uptake after rhTSH injection.                                                                                        |                                                                                                  |                                                                                                   |                                                       |                                                                                                                                                              |                  |                                                                                                                                                                                                                                                                                                                                                                                                                                                                                                                                                                                                                                                                                                                                                  |
| Abbreviations: rhTSH, recombinant human TSH; yrs, years; i.m., intramuscular; RAI, radioactive iodine; TSH, thyroid stimulating hormone; TC, thyroid carcinoma; WBS, whole body scan; DTC, differentiated thyroid carcinoma; TT, total thyroidectomy; SD, standard deviation |                                                                                                  |                                                                                                   |                                                       |                                                                                                                                                              |                  |                                                                                                                                                                                                                                                                                                                                                                                                                                                                                                                                                                                                                                                                                                                                                  |

| <b>Summary table Clinical Question 18.<br/>What is the difference in outcome of DTC in children treated with alternative medication versus surgery and I-131?</b>                                                                                           |                            |                                                                   |                                          |                                                                                                                                                                                                        |                                                                                                                                                                                                                                                                                                                                                                              |
|-------------------------------------------------------------------------------------------------------------------------------------------------------------------------------------------------------------------------------------------------------------|----------------------------|-------------------------------------------------------------------|------------------------------------------|--------------------------------------------------------------------------------------------------------------------------------------------------------------------------------------------------------|------------------------------------------------------------------------------------------------------------------------------------------------------------------------------------------------------------------------------------------------------------------------------------------------------------------------------------------------------------------------------|
| <b>Study (n=2)</b>                                                                                                                                                                                                                                          | <b>No. of participants</b> | <b>Age participants (yrs)</b>                                     | <b>Alternative medication</b>            | <b>Indication alternative medication</b>                                                                                                                                                               | <b>Main outcome</b>                                                                                                                                                                                                                                                                                                                                                          |
| <b>Mahajan (2018)<br/>30226445<br/>(case series)</b>                                                                                                                                                                                                        | 3                          | 1.14 year-old-female,<br>2.15-year-old male,<br>3.5-year-old male | Lenvatinib<br>(14mg/m <sup>2</sup> /day) | 1.Extensive PTC not amenable to upfront surgery of RAI<br>2.Iodine non-avid diffuse pulmonary disease after initial TT and CLND<br>3.Pulmonary disease progression after TT and CLND and RAI treatment | <i>Complications:</i> respiratory distress requiring oxygen caused by extensive bilateral metastatic pulmonary disease (all)<br><br><i>Disease outcome:</i> first two patients remained clinically stable on Lenvatinib 23 and 11 months after initiation of therapy, respectively, and the third patient transitioned to a tumor-specific targeted therapy after one month. |
| <b>Waguespack (2009)<br/>19355831<br/>(case report)</b>                                                                                                                                                                                                     | 1                          | 14-year-old female                                                | Sorafenib (start 200mg, twice daily)     | Progressive lung metastases                                                                                                                                                                            | <i>Disease outcome:</i> After 67 days, dramatic improvement in the lung metastases.<br>Minimal regrowth of the pulmonary metastases was observed, and a second treatment course of Sorafenib 200 mg every other day was equally successful in achieving a clinical response.                                                                                                 |
| <b>GRADE assessment:</b>                                                                                                                                                                                                                                    |                            |                                                                   |                                          |                                                                                                                                                                                                        |                                                                                                                                                                                                                                                                                                                                                                              |
| Study design:                                                                                                                                                                                                                                               |                            | +2 Observational evidence for a intervention question             |                                          |                                                                                                                                                                                                        |                                                                                                                                                                                                                                                                                                                                                                              |
| Study limitations:                                                                                                                                                                                                                                          |                            | -1 Limitations: high risk of selection bias                       |                                          |                                                                                                                                                                                                        |                                                                                                                                                                                                                                                                                                                                                                              |
| Consistency:                                                                                                                                                                                                                                                |                            | 0 NA                                                              |                                          |                                                                                                                                                                                                        |                                                                                                                                                                                                                                                                                                                                                                              |
| Directness:                                                                                                                                                                                                                                                 |                            | 0 Population of interest                                          |                                          |                                                                                                                                                                                                        |                                                                                                                                                                                                                                                                                                                                                                              |
| Precision:                                                                                                                                                                                                                                                  |                            | 0 No important imprecision                                        |                                          |                                                                                                                                                                                                        |                                                                                                                                                                                                                                                                                                                                                                              |
| Publication bias:                                                                                                                                                                                                                                           |                            | 0 Unlikely                                                        |                                          |                                                                                                                                                                                                        |                                                                                                                                                                                                                                                                                                                                                                              |
| Effect size:                                                                                                                                                                                                                                                |                            | 0 NA                                                              |                                          |                                                                                                                                                                                                        |                                                                                                                                                                                                                                                                                                                                                                              |
| Dose-response:                                                                                                                                                                                                                                              |                            | 0 NA                                                              |                                          |                                                                                                                                                                                                        |                                                                                                                                                                                                                                                                                                                                                                              |
| Plausible confounders                                                                                                                                                                                                                                       |                            | 0 No adjustment                                                   |                                          |                                                                                                                                                                                                        |                                                                                                                                                                                                                                                                                                                                                                              |
| Quality of evidence: ⊕⊖⊖⊖ (Very low quality)                                                                                                                                                                                                                |                            |                                                                   |                                          |                                                                                                                                                                                                        |                                                                                                                                                                                                                                                                                                                                                                              |
| Conclusion: Based on these case reports, Lenvatinib and Sorafenib may play an important role in the management of disease in these very rare cases of the pediatric patient with progressive RAI-refractory PTC, for which no good systemic therapy exists. |                            |                                                                   |                                          |                                                                                                                                                                                                        |                                                                                                                                                                                                                                                                                                                                                                              |
| Abbreviations: yrs, year; TT, total thyroidectomy; CLND, Central lateral neck dissection; RAI, radioactive iodine; mg, milligram; AB, attrition bias; CI, confidence interval; CF, confounding; DB, detection bias; SB, selection bias                      |                            |                                                                   |                                          |                                                                                                                                                                                                        |                                                                                                                                                                                                                                                                                                                                                                              |

| <b>Summary table</b><br><b>Clinical question 19. What is the sensitivity/specificity of neck ultrasound for recurrent DTC in follow-up of children who have been treated for DTC?</b>                                                                                                                                                                              |                                                                                                                                               |                                             |                |                 |                                                                                                                                            |                                                                                                                                                                                                                                                               |                   |                   |
|--------------------------------------------------------------------------------------------------------------------------------------------------------------------------------------------------------------------------------------------------------------------------------------------------------------------------------------------------------------------|-----------------------------------------------------------------------------------------------------------------------------------------------|---------------------------------------------|----------------|-----------------|--------------------------------------------------------------------------------------------------------------------------------------------|---------------------------------------------------------------------------------------------------------------------------------------------------------------------------------------------------------------------------------------------------------------|-------------------|-------------------|
| Study (n=1)                                                                                                                                                                                                                                                                                                                                                        | No. of participants                                                                                                                           | Age patients (mean±SD/median (range)) (yrs) | Follow-up time | Recurrence rate | Suspicious findings for malignancy                                                                                                         | Confirmation method                                                                                                                                                                                                                                           | Sensitivity of US | Specificity of US |
| <b>Vali (2014) 25524437</b>                                                                                                                                                                                                                                                                                                                                        | N=40 (original cohort 54),<br><br>(US follow-up of 40 patients available, no differences between all patients and patients with US follow-up) | 14.3±3.6                                    | 34 months      | 42.5% (17/40)   | Suspicious defined as: hypoechoic appearance, hyperechoic foci, peripheral vascularization, and round-shape node without hyperechoic hilum | Histopathology was considered the gold standard to assess the results of US. In cases where histopathology was not available a combination of stimulated thyroglobulin levels >10 ng/ml and post-therapy whole-body iodine scan was used as the gold standard | 85.7%             | 89.4%             |
| <b>GRADE assessment:</b><br>Study design: +4 Observational evidence for a diagnostic question<br>Study limitations: 0 No serious limitations: low risk of bias<br>Consistency: 0 NA<br>Directness: 0 Population of interest<br>Precision: -1 Sparse data<br>Publication bias: 0 Unlikely<br>Effect size: 0 NA<br>Dose-response: 0 NA<br>Plausible confounders 0 NA |                                                                                                                                               |                                             |                |                 |                                                                                                                                            |                                                                                                                                                                                                                                                               |                   |                   |
| Quality of evidence: ⊕⊕⊕⊖ ( <b>Moderate</b> )<br>Conclusion:<br>The sensitivity and specificity of thyroid ultrasound for recurrent DTC in follow-up of children who have been treated for DTC is 85.7% and 89.4% respectively. (1 study)                                                                                                                          |                                                                                                                                               |                                             |                |                 |                                                                                                                                            |                                                                                                                                                                                                                                                               |                   |                   |
| Abbreviations: US, ultrasound; AB, attrition bias; CI, confidence interval; CF, confounding; DB, detection bias; SB, selection bias                                                                                                                                                                                                                                |                                                                                                                                               |                                             |                |                 |                                                                                                                                            |                                                                                                                                                                                                                                                               |                   |                   |



| Summary table Clinical Question 21.<br>What are the late effects of treatment of childhood DTC? |                     |                                  |                               |                     |                                                                                                                                                                                                              |                                                                                                                                                                                                                                                                                                                                                                                                                                                                                                                                                                                              |
|-------------------------------------------------------------------------------------------------|---------------------|----------------------------------|-------------------------------|---------------------|--------------------------------------------------------------------------------------------------------------------------------------------------------------------------------------------------------------|----------------------------------------------------------------------------------------------------------------------------------------------------------------------------------------------------------------------------------------------------------------------------------------------------------------------------------------------------------------------------------------------------------------------------------------------------------------------------------------------------------------------------------------------------------------------------------------------|
| Study (n=8)                                                                                     | No. of participants | Age at diagnosis (yrs)           | Follow-up time (yrs)          | Late effect(s)      | Objectives/definitions                                                                                                                                                                                       | Main outcome                                                                                                                                                                                                                                                                                                                                                                                                                                                                                                                                                                                 |
| <b>Nies (2020)<br/>32079487</b>                                                                 | 56                  | Median 16.0<br>(range 13.7-17.5) | Median 15.4<br>(IQR 8.3-24.7) | Fertility           | Reproductive characteristics (pregnancies, live births, AMH levels ( $\mu\text{g/L}$ ))<br><br>( <i>versus control group</i> )                                                                               | 45.5% ( $\geq 18$ yrs) reported $\geq 1$ pregnancies, total n=64 pregnancies reported (2.6 pregnancies per survivor who reported to ever having been pregnant), 45 live births, 10.9% visited a fertility doctor or clinic.<br><br>No differences in AMH levels between DTC survivors and comparison group [2.0 (IQR 1.0-3.7) $\mu\text{g/L}$ vs 1.6 (IQR 0.6-3.1) $\mu\text{g/L}$ , respectively, $p=0.244$ ].<br><br>No major abnormalities in reproductive characteristics nor in predictors of ovarian failure in female survivors of DTC who received I-131 treatment during childhood. |
| <b>Nies (2018)<br/>29254931</b>                                                                 | 39                  | Mean 15.6<br>(range 12.0-18.7)   | Median 10.7<br>(5.0-23.3)     | Quality of life     | Achievement of psychosocial milestones (social, autonomy, and psychosexual development) measured with course of life questionnaire (CoLQ)<br><br>( <i>versus control group</i> )                             | CoLQ did not significantly differ between survivors of childhood DTC and two non-affected groups (non-affected with cancer and other CCS)<br><br>Survivors of childhood DTC scored significantly higher on social development than other CCS, but scores were similar on autonomy and psychosexual developmental scales.                                                                                                                                                                                                                                                                     |
| <b>Nies (2017)<br/>28001468</b>                                                                 | 67                  | Median 15.8<br>(range 7.9-18.8)  | Median 17.8<br>(5.0-44.7)     | Quality of life     | Short-Form 36 (SF-36)<br>Multidimensional Fatigue Inventory 20 (MFI-20)<br>Hospital Anxiety and Depression Scale (HADS)<br>Thyroid cancer-specific HRQoL (THYRCA-QoL)<br><br>( <i>versus control group</i> ) | On most QoL subscales, scores of survivors and controls did not differ significantly.<br><br>SF-36: more physical problems ( $P = 0.031$ ), more role limitations due to physical problems ( $P = 0.021$ )<br>MFI-20: more mental fatigue ( $P = 0.016$ )<br>HADS: no differences<br><br>Treatment with a higher cumulative dose of 131-I was associated with more complaints of headache ( $P = 0.006$ ).                                                                                                                                                                                   |
| <b>Klein Hesselink (2017)<br/>29132262</b>                                                      | 66                  | Median 15.9<br>(range 7.9-18.9)  | Median 17<br>(5-43)           | Cardiac dysfunction | Echocardiography<br><br>24-hour Holter electrocardiography<br><br>Plasma biomarkers (N-terminal probrain natriuretic peptide, high-sensitive troponin-T, galectin-3)                                         | Mean of septal and lateral early diastolic tissue velocity (mean 14.5 versus 15.8 cm/s, $P = 0.006$ , survivors vs controls, respectively)<br>Diastolic dysfunction in n=14 (21.2%) asymptomatic survivors<br><br>All survivors showed sinus rhythm; AF was not observed.<br><br>In survivors, biomarkers were not associated with diastolic dysfunction                                                                                                                                                                                                                                     |

|                                           |                    |                                                               |                                                             |                                              |                                                                                                                                                                            |                                                                                                                                                                                                                                                                                                                                                                                                                                                                                                                                                                                                                                                                                                                                                                                                                                                                                                                                                                                                                                        |
|-------------------------------------------|--------------------|---------------------------------------------------------------|-------------------------------------------------------------|----------------------------------------------|----------------------------------------------------------------------------------------------------------------------------------------------------------------------------|----------------------------------------------------------------------------------------------------------------------------------------------------------------------------------------------------------------------------------------------------------------------------------------------------------------------------------------------------------------------------------------------------------------------------------------------------------------------------------------------------------------------------------------------------------------------------------------------------------------------------------------------------------------------------------------------------------------------------------------------------------------------------------------------------------------------------------------------------------------------------------------------------------------------------------------------------------------------------------------------------------------------------------------|
|                                           |                    |                                                               |                                                             |                                              | (versus control group)                                                                                                                                                     |                                                                                                                                                                                                                                                                                                                                                                                                                                                                                                                                                                                                                                                                                                                                                                                                                                                                                                                                                                                                                                        |
| <b>Monteiro de Barros (2016) 26056020</b> | 17                 | Mean 12.6 ± 2.2<br><i>(age start TSH suppression therapy)</i> | 14.2 ± 7.2<br><i>(duration TSH suppression therapy)</i>     | Bone mineral density                         | Dual-energy X-ray absorptiometry (DXA)<br>HR-pQCT<br><br><i>(versus control group)</i>                                                                                     | No differences were found between patients and controls with respects to BMD and Z scores at any site evaluated by DXA.<br><br>No differences were found in the bone microstructure parameters evaluated by HR-pQCT                                                                                                                                                                                                                                                                                                                                                                                                                                                                                                                                                                                                                                                                                                                                                                                                                    |
| <b>Leonova (2014) 25374130</b>            | 124 (females only) | Mean 14.04 ± 5.03                                             | Mean 11.50 ± 4.14                                           | Bone mineral density                         | Calcium-D3 supplementation and TSH suppressive therapy on bone mineral density (BMD)                                                                                       | No Calcium-D3 supplementation vs Calcium D3 supplementation (mean ± SD)<br>TSH: 0.69 ±1.51 vs 0.62 ±1.67 (p=0.08)<br>FT4: 21.88 ±6.57 vs 23.32 ±6.1 (p=0.16)<br>Parathormone: 28.74 ±10.77 vs 11.66 ±9.93 (p=0.0001)<br>Ca: 2.33 ±0.22 vs 2.03 ±0.28 (p=0.0001)<br>Ca2+: 1.19 ±0.09 vs 1.06 ±0.16 (p=0.0001)<br>25(OH)-vitamin D: 37.57 ±9.65 vs 45.17 ±11.81 (p=0.050)<br>Phosphate: 1.23 ±0.19 vs 1.64 ±0.32 (p=0.0001)<br><br>Lumbar spine BMD (L1-L4) (g/cm2): 1.21 ±0.16 vs 1.34 ±0.18 (p=0.0001)<br>Lumbar spine T-score: 0.06 ±1.13 vs 1.15 ±1.41 (p=0.0001)<br>Lumbar spine Z-score: 0.27 ±1.0 vs 1.32 ±1.37 (p=0.0001)<br>Total proximal femur BMD (g/cm2): 1.03 ±0.13 vs 1.14 ±0.32 (p=0.0001)<br>Proximal femur T-score: 0.27 ±1.06 vs 1.32 ±1.14 (p=0.0001)<br>Proximal femur Z-score: 0.39 ±0.96 vs 1.42 ±1.14 (p=0.0001)<br><br><i>Calcium-D3 medication has a beneficial effect on BMD<br/>TSH-suppressive therapy does not affect BMD in women treated for DTC at young age, at least after 10 years of follow-up.</i> |
| <b>Selvakumar (2018) 30504138</b>         | 65                 | 15 (IQR 13-17)                                                | Median 11 (IQR 6-22)                                        | Salivary gland dysfunction<br><br>Xerostomia | Unstimulated whole saliva flow ≤0.2mL/min and/or a stimulated whole saliva flow ≤0.7 mL/min<br><br>Xerostomia related complaints were evaluated using the XI questionnaire | Salivary dysfunction: n=30 (47.6%)<br>Xerostomia (moderate to severe): n=22 (35.5%)<br><br>Stimulated salivary secretion was lower and the severity of xerostomia complaints higher in patients treated with higher cumulative <sup>131</sup> I activity                                                                                                                                                                                                                                                                                                                                                                                                                                                                                                                                                                                                                                                                                                                                                                               |
| <b>Albano (2017) 28436606</b>             | 105                |                                                               | Late effects: at least a few weeks after hospital discharge | Salivary gland dysfunction<br>BM suppression | BM suppression defined as significant reduction in the number of leukocytes, erythrocytes, and platelets (according CTCAE)                                                 | N=12 children ≥ 1 late complication (n=20 complications)<br><br>Permanent salivary dysfunction: n=2<br>Permanent BM suppression: n=2<br>Pulmonary fibrosis: n=5                                                                                                                                                                                                                                                                                                                                                                                                                                                                                                                                                                                                                                                                                                                                                                                                                                                                        |

|                                                                                                                                                                                                                                                                                                                                                                                                                                                                                                                                                                                                                                                                                                                                                                                                                                                                                                                                                                                                                                                                                                                                                                                                                                                                                                                                                                                                                                                                                                                                             |  |                                                                                                                                                                                                                                                                                                                                                                                                                                     |  |                                                            |                                                                                                                                                                                                                                                                                                    |                                                                                                                                                                                              |
|---------------------------------------------------------------------------------------------------------------------------------------------------------------------------------------------------------------------------------------------------------------------------------------------------------------------------------------------------------------------------------------------------------------------------------------------------------------------------------------------------------------------------------------------------------------------------------------------------------------------------------------------------------------------------------------------------------------------------------------------------------------------------------------------------------------------------------------------------------------------------------------------------------------------------------------------------------------------------------------------------------------------------------------------------------------------------------------------------------------------------------------------------------------------------------------------------------------------------------------------------------------------------------------------------------------------------------------------------------------------------------------------------------------------------------------------------------------------------------------------------------------------------------------------|--|-------------------------------------------------------------------------------------------------------------------------------------------------------------------------------------------------------------------------------------------------------------------------------------------------------------------------------------------------------------------------------------------------------------------------------------|--|------------------------------------------------------------|----------------------------------------------------------------------------------------------------------------------------------------------------------------------------------------------------------------------------------------------------------------------------------------------------|----------------------------------------------------------------------------------------------------------------------------------------------------------------------------------------------|
|                                                                                                                                                                                                                                                                                                                                                                                                                                                                                                                                                                                                                                                                                                                                                                                                                                                                                                                                                                                                                                                                                                                                                                                                                                                                                                                                                                                                                                                                                                                                             |  |                                                                                                                                                                                                                                                                                                                                                                                                                                     |  | <p>Pulmonary fibrosis<br/>Second cancers<br/>Fertility</p> | <p>Fertility defined as all problems which determine the incapacity to fulfill pregnancy after a reasonable time of sexual intercourse with no contraceptive measures taken</p> <p>No definitions with regards to registered side effects as salivary gland dysfunction and pulmonary fibrosis</p> | <p>Second cancers: n=4<br/>Fertility alterations: n=5</p> <p>Late events, except fertility alterations, were correlated with the number of therapies and cumulative activities of I-131.</p> |
| <p><b>GRADE assessment:</b></p>                                                                                                                                                                                                                                                                                                                                                                                                                                                                                                                                                                                                                                                                                                                                                                                                                                                                                                                                                                                                                                                                                                                                                                                                                                                                                                                                                                                                                                                                                                             |  | <p>Study design: +4 Observational evidence for a diagnostic question</p> <p>Study limitations: 0 Low risk of bias</p> <p>Consistency: 0 No important inconsistency between studies</p> <p>Directness: 0 Population of interest</p> <p>Precision: -1 Relatively few patients and few events</p> <p>Publication bias: 0 Unlikely</p> <p>Effect size: 0 NA</p> <p>Dose-response: 0 NA</p> <p>Plausible confounders 0 No adjustment</p> |  |                                                            |                                                                                                                                                                                                                                                                                                    |                                                                                                                                                                                              |
| <p>Quality of evidence: ⊕⊕⊕⊖ (moderate quality)</p> <p>Conclusion: In these studies, several potential late effects in survivors of DTC are investigated.</p> <p><b>Cardiac dysfunction:</b> In 21.2% of asymptomatic survivors diastolic dysfunction was found (1 study).</p> <p><b>Salivary gland dysfunction:</b> In 1.9-47.6% and 35.5% of the DTC survivors salivary dysfunction and xerostomia were found, respectively (2 studies)</p> <p><b>Quality of life:</b> No differences were found in the course of life questionnaire between DTC survivors and two non-affected groups (non-affected with cancer and other CCS). Also on most quality of life subscales, score of DTC survivors and controls did not differ significantly. However, more physical problems, more role limitations due to physical problems and more mental fatigue was described by DTC survivors (2 studies).</p> <p><b>Bone mineral density:</b> No differences were found with respects to BMD and Z scores at any site evaluated by DXA and in bone microstructure parameters between DTC survivors and controls. However, Calcium-D3 medication has a beneficial effect on BMD. TSH-suppressive therapy does not affect BMD in women treated for DTC at young age, at least after 10 years of follow-up (2 studies)</p> <p><b>Female fertility:</b> No major abnormalities in reproductive characteristics nor in predictors of ovarian failure in female survivors of DTC who received I-131 treatment during childhood were reported (1 study)</p> |  |                                                                                                                                                                                                                                                                                                                                                                                                                                     |  |                                                            |                                                                                                                                                                                                                                                                                                    |                                                                                                                                                                                              |
| <p>Abbreviations: AMH, anti-mullerian hormone; CTCAE, common terminology criteria for adverse events; IQR, interquartile range; yrs, year; HRQoL, health related quality of life; AB, attrition bias; CI, confidence interval; CF, confounding; DB, detection bias; SB, selection bias</p>                                                                                                                                                                                                                                                                                                                                                                                                                                                                                                                                                                                                                                                                                                                                                                                                                                                                                                                                                                                                                                                                                                                                                                                                                                                  |  |                                                                                                                                                                                                                                                                                                                                                                                                                                     |  |                                                            |                                                                                                                                                                                                                                                                                                    |                                                                                                                                                                                              |

| Summary table Clinical question 22.<br>Is presentation, outcome or disease course of DTC in children with genetic syndromes different than in children without genetic syndromes for which treatment or follow up should be adjusted? |                                                                     |                               |                  |                                                                                                                                                                                                                                               |                                                                                                   |                                                                                                                                                                                                                              |                                                                                                                           |
|---------------------------------------------------------------------------------------------------------------------------------------------------------------------------------------------------------------------------------------|---------------------------------------------------------------------|-------------------------------|------------------|-----------------------------------------------------------------------------------------------------------------------------------------------------------------------------------------------------------------------------------------------|---------------------------------------------------------------------------------------------------|------------------------------------------------------------------------------------------------------------------------------------------------------------------------------------------------------------------------------|---------------------------------------------------------------------------------------------------------------------------|
| Study (n=2)                                                                                                                                                                                                                           | No. of participants                                                 | Age patients at diagnosis DTC | Genetic syndrome | Cancer type and behavior                                                                                                                                                                                                                      | Genetic analysis                                                                                  | Conclusion papers                                                                                                                                                                                                            | Suggestion therapy adjustment                                                                                             |
| <b>Van der Tuin (2019) 30260442</b>                                                                                                                                                                                                   | 10                                                                  | Mean 14.7±6.2 years           | DICER1           | 10/10 thyroid specimens showed diffuse nodular hyperplasia with multiple, discrete, well-circumscribed, and occasionally encapsulated nodules. No infiltrative growth, extra thyroidal extension, vascular invasion, or lymph node metastasis | 9/10 DICER1-related DTCs lacked well-known oncogenic driver DNA variants and gene rearrangements. | On the basis of our clinical, histological, and molecular data, we consider that most DICER1-related DTCs form a low-risk subgroup.                                                                                          | Authors: Radioiodine treatment may be unnecessary given the patients' ages and the tumors' low propensity for metastases. |
| <b>Jonker &amp; Lebbink (2020) 33088791</b>                                                                                                                                                                                           | 27 (all cases of DTC identified in the literature in PHTS patients) | Median 12 (range 4-17)        | PHTS             | 52% FTC<br>2/27 metastatic DTC<br>2/27 recurrence                                                                                                                                                                                             | <i>PTEN</i> mutation                                                                              | No reports of more aggressive behavior of DTC, defined as increased risk for metastasized disease at diagnosis, recurrence, or increased morbidity or mortality when compared to children with sporadic DTC, could be found. |                                                                                                                           |
| <b>GRADE assessment:</b>                                                                                                                                                                                                              |                                                                     |                               |                  |                                                                                                                                                                                                                                               |                                                                                                   |                                                                                                                                                                                                                              |                                                                                                                           |
| Study design:                                                                                                                                                                                                                         | +2 <i>Observational evidence for a intervention question</i>        |                               |                  |                                                                                                                                                                                                                                               |                                                                                                   |                                                                                                                                                                                                                              |                                                                                                                           |
| Study limitations:                                                                                                                                                                                                                    | -1 <i>Limitations (small number of patients)</i>                    |                               |                  |                                                                                                                                                                                                                                               |                                                                                                   |                                                                                                                                                                                                                              |                                                                                                                           |
| Consistency:                                                                                                                                                                                                                          | 0 <i>NA</i>                                                         |                               |                  |                                                                                                                                                                                                                                               |                                                                                                   |                                                                                                                                                                                                                              |                                                                                                                           |
| Directness:                                                                                                                                                                                                                           | 0 <i>No indirectness</i>                                            |                               |                  |                                                                                                                                                                                                                                               |                                                                                                   |                                                                                                                                                                                                                              |                                                                                                                           |
| Precision:                                                                                                                                                                                                                            | 0 <i>No important imprecision</i>                                   |                               |                  |                                                                                                                                                                                                                                               |                                                                                                   |                                                                                                                                                                                                                              |                                                                                                                           |
| Publication bias:                                                                                                                                                                                                                     | 0 <i>Unlikely</i>                                                   |                               |                  |                                                                                                                                                                                                                                               |                                                                                                   |                                                                                                                                                                                                                              |                                                                                                                           |
| Effect size:                                                                                                                                                                                                                          | 0 <i>NA</i>                                                         |                               |                  |                                                                                                                                                                                                                                               |                                                                                                   |                                                                                                                                                                                                                              |                                                                                                                           |
| Dose-response:                                                                                                                                                                                                                        | 0 <i>NA</i>                                                         |                               |                  |                                                                                                                                                                                                                                               |                                                                                                   |                                                                                                                                                                                                                              |                                                                                                                           |
| Plausible confounders                                                                                                                                                                                                                 | 0 <i>NA</i>                                                         |                               |                  |                                                                                                                                                                                                                                               |                                                                                                   |                                                                                                                                                                                                                              |                                                                                                                           |
| Quality of evidence: ⊕⊖⊖⊖ (very low)                                                                                                                                                                                                  |                                                                     |                               |                  |                                                                                                                                                                                                                                               |                                                                                                   |                                                                                                                                                                                                                              |                                                                                                                           |
| Conclusion:                                                                                                                                                                                                                           |                                                                     |                               |                  |                                                                                                                                                                                                                                               |                                                                                                   |                                                                                                                                                                                                                              |                                                                                                                           |
| <b>DICER1:</b> Histological characteristics and molecular data may show signs of less aggressive tumor behavior in these children. (1 study)                                                                                          |                                                                     |                               |                  |                                                                                                                                                                                                                                               |                                                                                                   |                                                                                                                                                                                                                              |                                                                                                                           |
| <b>PHTS:</b> DTC in pediatric PHTS patients does not seem to be more aggressive than sporadic DTC. (1 study)                                                                                                                          |                                                                     |                               |                  |                                                                                                                                                                                                                                               |                                                                                                   |                                                                                                                                                                                                                              |                                                                                                                           |
| Abbreviations: DTC, differentiated thyroid carcinoma; AB, attrition bias; CI, confidence interval; CF, confounding; DB, detection bias; SB, selection bias                                                                            |                                                                     |                               |                  |                                                                                                                                                                                                                                               |                                                                                                   |                                                                                                                                                                                                                              |                                                                                                                           |

**Summary table Clinical question 23.**  
**Is presentation, outcome or disease course of DTC in children with a history of radiation exposure different than in children without a history of radiation exposure for which treatment or follow-up should be adjusted?**

| Study (n=4)                                            | No. of participants                                                 | Cohort                                                                                                                                        | Aim                                                                                                                                                                                                                 | Outcome                                                                                                                                                                                                                                                                                                                                                                                                                                                       |
|--------------------------------------------------------|---------------------------------------------------------------------|-----------------------------------------------------------------------------------------------------------------------------------------------|---------------------------------------------------------------------------------------------------------------------------------------------------------------------------------------------------------------------|---------------------------------------------------------------------------------------------------------------------------------------------------------------------------------------------------------------------------------------------------------------------------------------------------------------------------------------------------------------------------------------------------------------------------------------------------------------|
| <b>Clement &amp; Lebbink (2020)</b><br><b>32449692</b> | 31<br><i>(only 9/31 were ≤18 years of age at diagnosis of DTC)</i>  | CCS (18/31 (58.1%) had received RT to a field including the thyroid gland)                                                                    | To evaluate the mode of detection, presentation, treatment and outcome of subsequent DTC among CCS                                                                                                                  | CCS with subsequent DTC tended to have on average smaller tumors (1.9 vs 2.4 cm, respectively, $P = 0.051$ ), and more often bilateral (5/25 (60.0%) vs 28/92 (30.4%), $P = 0.024$ ).<br>There were no significant differences in the occurrence of surgical complications, recurrence rate or disease-related death.                                                                                                                                         |
| <b>Sassolas (2013)</b><br><b>23286372</b>              | 24<br><i>(only 16/24 were ≤20 years of age at diagnosis of DTC)</i> | CCS (All radiation exposed (RAD))                                                                                                             | To evaluate clinical presentation of thyroid cancers in patients with previous external radiation exposure (RAD), and to compare the evolution of such patients to that of nonexposed patients (matched-controls).  | The mean tumor size (largest diameter) was higher in controls ( $p < 0.05$ ). More microcarcinomas were found in the CCS ( $p = 0.05$ ). There was no difference in the proportions of multifocality, ETE, and LNM.<br>No difference in the risk of cervical recurrence between the RAD group and controls (low and high risk)                                                                                                                                |
| <b>Pacini (1997)</b><br><b>9360507</b>                 | 472                                                                 | Chernobyl cohort<br><i>(compared to cohort Italy/France)</i>                                                                                  | To compare clinical and epidemiological features of children with thyroid carcinoma in the Chernobyl region (radiation exposed) to controls                                                                         | Significant higher proportion of follicular carcinomas in cases compared to controls ( $p = 0.0001$ )<br>More ETE and LNM in cases (49.1%, $p = 0.0001$ ; and 64.6%, $p = 0.002$ , respectively) with respect to controls (24.9% and 53.9%, respectively).                                                                                                                                                                                                    |
| <b>Bogdanova (2019)</b><br><b>31569930</b>             | 187<br>4-14 yrs<br><i>(n=121)</i><br>15-18 yrs<br><i>(n=66)</i>     | Chernobyl cohort (4-18 yrs)<br>4-14 yrs:<br>OCh (+): n=10 (8.3%)<br>OCh (-): n=111 (91.7%)<br><br>15-18 yrs:<br>OCh (+): n=4<br>OCh (-): n=62 | Histopathological characteristics of potentially radiogenic PTC depending on oncocyctic changes availability in tumor cells (oncocyctic changes (OCh): defined as oncyphilic/Hurtle cell metaplasia in tumor cells) | 4-14 yrs: significant more solid-trabecular characteristics in OCh (+) vs OCh (-) tumors (100% vs 55.0%, $p < 0.001$ )<br><i>Difference not found in age group 15-18 yrs</i><br><br>No significant differences in ETE, multifocality, lymphatic/vascular invasion, LNM, distant lung metastases between OCh(+) and OCh(-) tumors<br><br>4-14 yrs: Significant more chronic thyroiditis in patients with OCh (+) vs OCh (-) tumors (60% vs 8.1%, $p < 0.001$ ) |

|                                                                                                                                                                                                                                                                                                                                                                       |                                                              |  |  |                                                                                                     |
|-----------------------------------------------------------------------------------------------------------------------------------------------------------------------------------------------------------------------------------------------------------------------------------------------------------------------------------------------------------------------|--------------------------------------------------------------|--|--|-----------------------------------------------------------------------------------------------------|
|                                                                                                                                                                                                                                                                                                                                                                       |                                                              |  |  | <i>Difference not found in age group 15-18 yrs</i>                                                  |
|                                                                                                                                                                                                                                                                                                                                                                       |                                                              |  |  | No significant differences in recurrence of regional metastases or additional non-thyroidal cancer. |
| <b>GRADE assessment:</b>                                                                                                                                                                                                                                                                                                                                              |                                                              |  |  |                                                                                                     |
| Study design:                                                                                                                                                                                                                                                                                                                                                         | +2 <i>Observational evidence for a intervention question</i> |  |  |                                                                                                     |
| Study limitations:                                                                                                                                                                                                                                                                                                                                                    | -1 <i>Limitations (small number of patients)</i>             |  |  |                                                                                                     |
| Consistency:                                                                                                                                                                                                                                                                                                                                                          | -1 <i>Inconsistency</i>                                      |  |  |                                                                                                     |
| Directness:                                                                                                                                                                                                                                                                                                                                                           | 0 <i>No important indirectness</i>                           |  |  |                                                                                                     |
| Precision:                                                                                                                                                                                                                                                                                                                                                            | 0 <i>No important imprecision</i>                            |  |  |                                                                                                     |
| Publication bias:                                                                                                                                                                                                                                                                                                                                                     | 0 <i>Unlikely</i>                                            |  |  |                                                                                                     |
| Effect size:                                                                                                                                                                                                                                                                                                                                                          | 0 <i>NA</i>                                                  |  |  |                                                                                                     |
| Dose-response:                                                                                                                                                                                                                                                                                                                                                        | 0 <i>NA</i>                                                  |  |  |                                                                                                     |
| Plausible confounders                                                                                                                                                                                                                                                                                                                                                 | 0 <i>NA</i>                                                  |  |  |                                                                                                     |
| Quality of evidence: ⊕⊕⊕⊕ (very low)                                                                                                                                                                                                                                                                                                                                  |                                                              |  |  |                                                                                                     |
| Conclusion:                                                                                                                                                                                                                                                                                                                                                           |                                                              |  |  |                                                                                                     |
| <b>Presentation:</b>                                                                                                                                                                                                                                                                                                                                                  |                                                              |  |  |                                                                                                     |
| CCS with subsequent DTC tended to have on average smaller tumors and might have more often bilateral disease (2 studies)                                                                                                                                                                                                                                              |                                                              |  |  |                                                                                                     |
| <b>Disease course:</b>                                                                                                                                                                                                                                                                                                                                                |                                                              |  |  |                                                                                                     |
| Inconsistent findings about difference in tumor characteristics (ETE and LNM) were reported. ETE and LNM might be more frequently found in radiation induced thyroid tumors in children diagnosed in the Chernobyl region (2 studies)                                                                                                                                 |                                                              |  |  |                                                                                                     |
| <b>Outcome:</b>                                                                                                                                                                                                                                                                                                                                                       |                                                              |  |  |                                                                                                     |
| No significant differences were found between CCS with subsequent DTC and controls in the occurrence of surgical complications, recurrence rate or disease-related death. (2 studies)                                                                                                                                                                                 |                                                              |  |  |                                                                                                     |
| Abbreviations: DTC, differentiated thyroid carcinoma; PTC, papillary thyroid carcinoma; CCS, childhood cancer survivors; OCh, oncocytic changes; ETE, extra thyroidal extension; LNM, lymph node metastases; RAD, external radiation exposure; RT, radiotherapy; AB, attrition bias; CI, confidence interval; CF, confounding; DB, detection bias; SB, selection bias |                                                              |  |  |                                                                                                     |
